# Supplementary material
Source: PubMed Central journal article supplement (PMC8106316)
Supplement: pnas.2018181118.sapp.pdf [file pnas.2018181118.sapp.pdf]

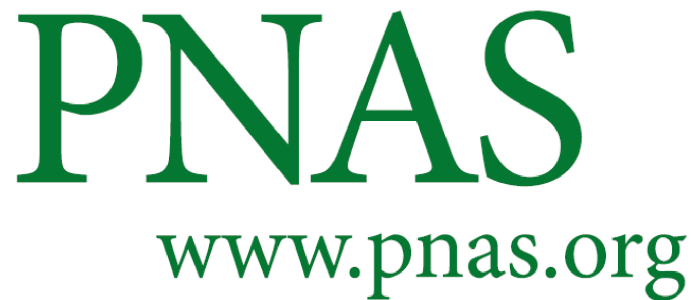

**Supplementary Information for**  
**High throughput functional variant screens *via* in-vivo production of single-stranded DNA**

Max G. Schubert, Daniel B. Goodman, Timothy M. Wannier, Divjot Kaurr, Fahim Farzadfard, Timothy K. Lu, Seth L. Shipman, and George M. Church

Max Schubert  
Email: [mgschubert@gmail.com](mailto:mgschubert@gmail.com)

**This PDF file includes:**

Figures S1 to S6  
Tables S1-S4

**Other supplementary materials for this manuscript include the following:**

All data and scripts necessary to reproduce figures and analysis can be found at <https://github.com/churchlab/rlr> including additional formats of the supplemental files contained here.

**Supplemental\_Dataset\_S1 (supplemental sequence maps):** generalized genbank plasmid maps for Retron Recombineering plasmids used in this study, and a sf.GFP-expressing control plasmid, supplied in Genbank format in a single text file. Please note that some sequence analysis software may require separation into separate files and changing extension to '.gb'.

**Supplemental\_Dataset\_S2:** Filtered mutations observed in whole genome sequencing (summarized in figure S4).

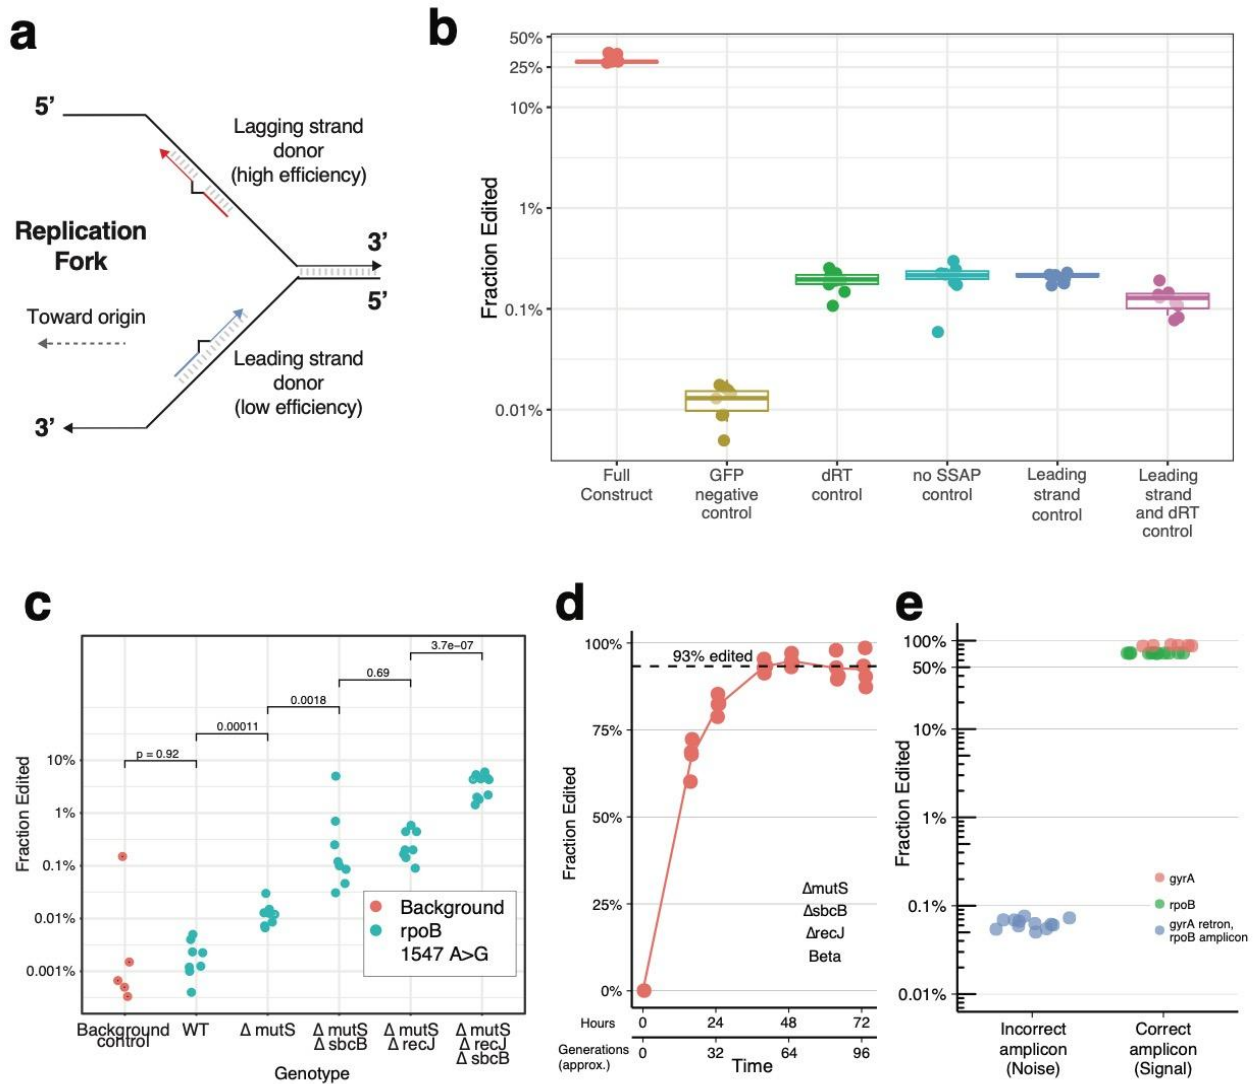

### Supplemental Figure 1:

- (a) A diagram of the replication fork, depicting recombineering donors annealing to either the leading strand of replication, or the lagging strand of replication.
- (b) A confirmation of the mechanism of editing. Editing was compared between the full RLR system expressing the *gyrA* 248 C>T donor using Beta as a Single-stranded annealing protein (SSAP), and control constructs expressing only GFP, having an inactivated retron reverse-transcriptase active site (dRT) and/or reverse-complemented donor DNA annealing to the leading strand, or which do not express an SSAP protein. Editing was performed in the  $\Delta mutS \Delta recJ \Delta sbcB$  background, with Beta as an SSAP. Individual measurements are represented with dots, and the data is summarized by box plots in the style of Tukey.
- (c) The edited fraction of cells, measured phenotypically by resistance to rifampicin at 25ug/mL. These results confirm those shown in Figure 2B, but are measured by plating for CFU, rather than by amplicon sequencing at the edited locus.
- (d) The continuous nature of Retron editing.  $\Delta mutS \Delta recJ \Delta sbcB$  cells expressing the *gyrA* retron with Beta as an SSAP were sampled during continuous growth and induction

in a turbidostat. The edited fraction of the *gyrA* locus was determined by amplicon deep sequencing over time. This data also depicted in figure 2C, but with inferred generations of growth on the X axis rather than time.

e) Control experiment characterizing error and noise. A culture editing *gyrA* was subjected to amplicon-NGS of the non-edited *rpoB* locus, to determine a background level of editing in the assay, alongside positive controls treated normally. Background editing is most likely due to sequencing error and mis-assigned indices. The mean of this background signal is depicted by a green dotted line in figure 2B, below which

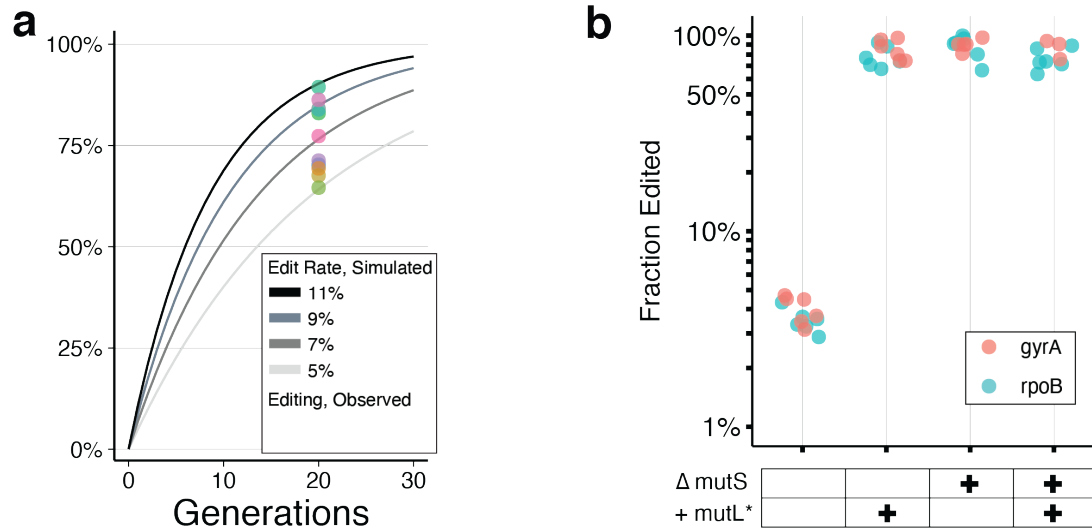

**Supplemental Figure 2:**

a) Mean edited fraction of the loci in figure 2d are shown alongside a simulated editing trajectory of alleles with neutral fitness effect, as per the model introduced in figure S5. This estimate is suggestive of editing rate of 5-11% per generation for these allele.

b) Retron plasmids with and without a dominant-negative MutL-E32K variant (mutL\*) were expressed in batch growth, in strains with and without inactivation of mutS ( $\Delta$ mutS). Retron plasmids targeted *gyrA* and *rpoB* loci as per figure 2b and used CspRecT as an SSAP. Four replicate experiments per locus and condition are indicated with dots.

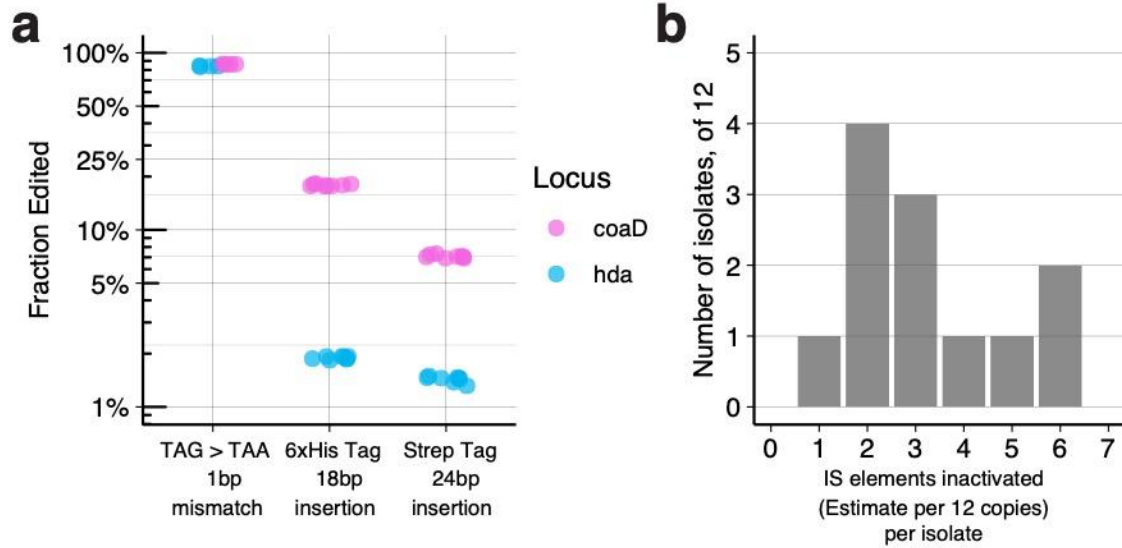

**Supplemental Figure 3:**

a) For two essential genes, *hda* and *coaD*, retrons were used to incorporate C-terminal tags, to determine the efficiency of incorporating longer insertions. Fraction edited was determined by amplicon-NGS as previously. Results of 8 replicate experiments are depicted with dots, alongside experiments shown in Figure 2D for the same loci, for comparison. Unlike the 1bp mismatch experiment, edited amplicons for insertions are approximately 10% longer than the non-edited amplicons, possibly introducing PCR bias toward un-edited sequences. This makes the edited fractions reported here likely an under-estimate.

b) A retron targeting the 12 copies of the IS5 transposase with a small inactivating insertion was expressed, and whole-genome sequencing was performed on isolates. The number of IS elements inactivated was estimated from the allelic fraction of the inactivation allele observed within reads.

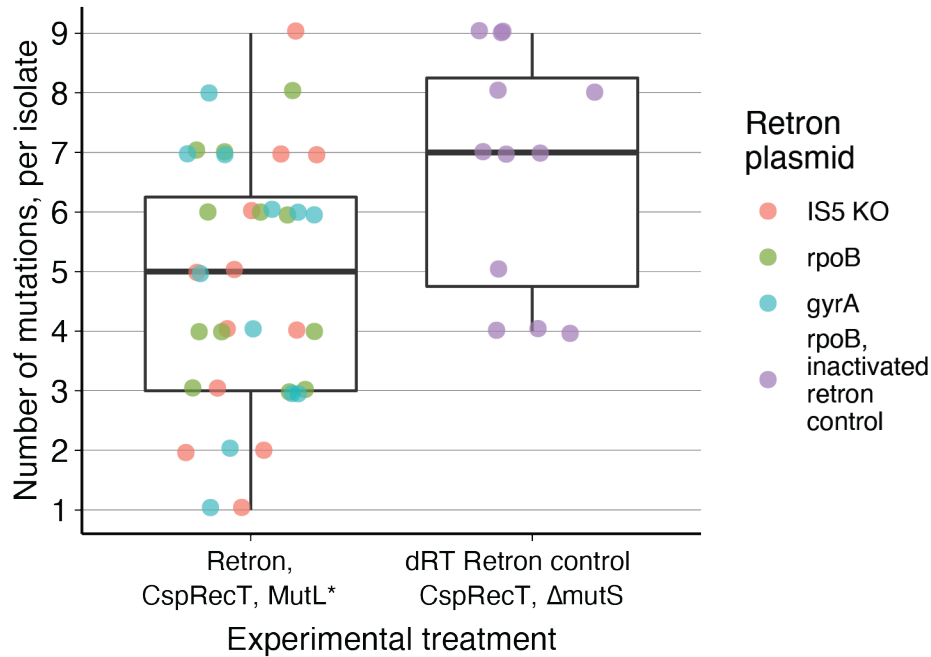

**Supplemental Figure 4:**

Before and after induction and editing, whole genome sequencing was performed on isolates to measure overall mutagenesis, and search for off-target editing. 12 isolates for each of three retron donors expressing mutL\*, and an inactivated retron control in a ΔmutS strain were sequenced, alongside their parent strains, and the number of mutations per isolate are depicted with individual dots, and summarized by box plots per plasmid type.

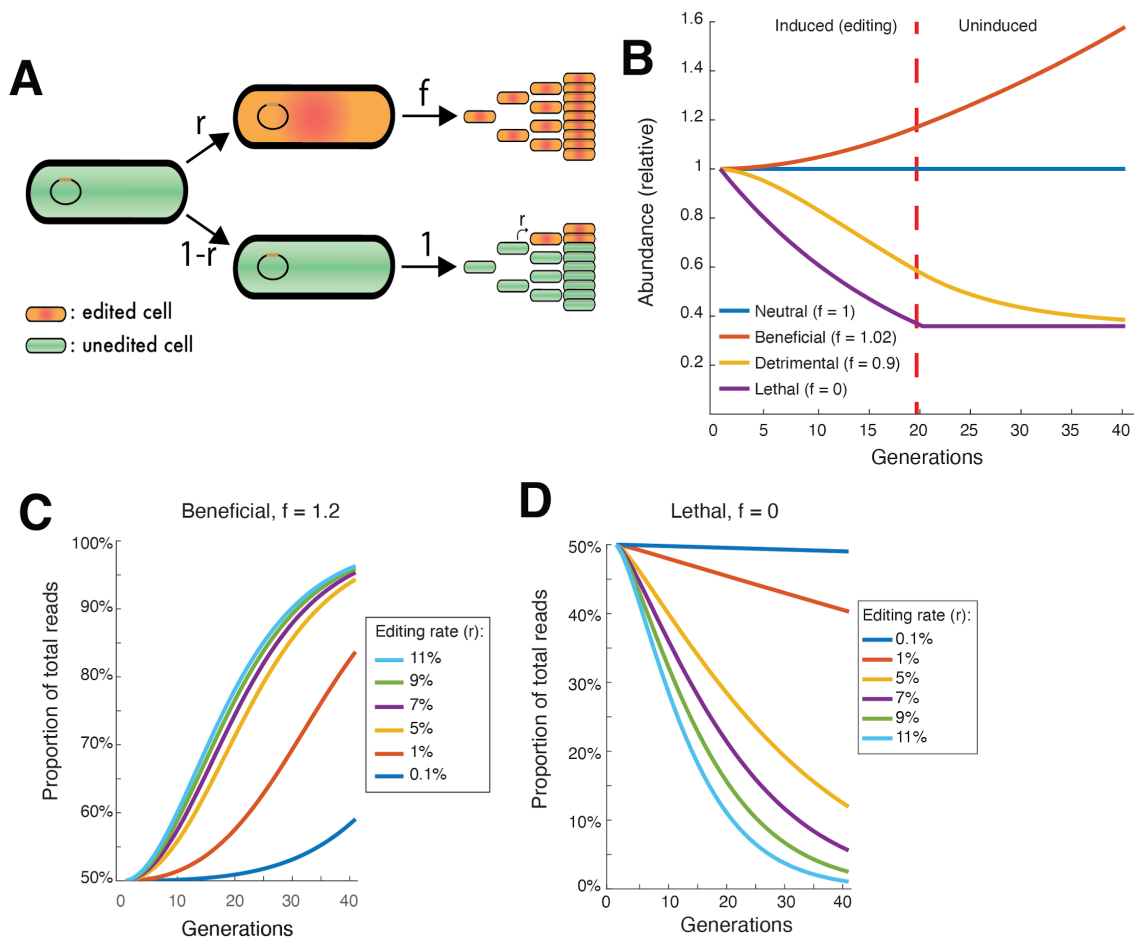

### Supplemental figure 5:

**(A)** A population genetics model describing the Retron Library Recombining (RLR) process. Each generation, a cell has probability “ $r$ ” of being successfully edited by the retron construct it bears, and if so edited, propagates at rate “ $f$ ” determined by the fitness of this mutation in future generations. If not edited in a given generation, which occurs at a rate  $1-r$ , editing may occur in future generations.

**(B)** The population genetics model predicts that for beneficial alleles, the editing process can be halted (red vertical line), and the lineage of cells marked with the beneficial retron will continue to become more abundant. In contrast, for deleterious or lethal mutations, continued decrease in abundance of a barcoded population is dependent on continued induction and editing.

**(C)** The growth of populations bearing a retron conferring mutations with growth rate 120% that of the parent ( $f = 1.2$ ) are simulated, for different rates of editing ( $r$ ). Population size compared to a simulated neutral parent control, and thus proportion of barcode reads observed, is depicted on the Y axis. The signal observed for beneficial alleles is large, and does not vary substantially if editing frequency varies among alleles. This is compatible with quantitative measurement of beneficial allele fitness, even if editing rate varies somewhat. Additionally, beneficial alleles can be detected even with

inefficient editing.

**(D)** Simulated growth of populations as in Figure S2C, except with a Lethal mutation ( $f = 0$ ). In contrast with Figure S2C, the signal for deleterious or lethal alleles is comparatively small, and scales with editing rate to a greater degree. This indicates that quantification of deleterious phenotypes will be clouded by differences in editing rate among alleles to a greater degree, and that deleterious phenotypes require more efficient editing and/or editing over more generations for robust detection.



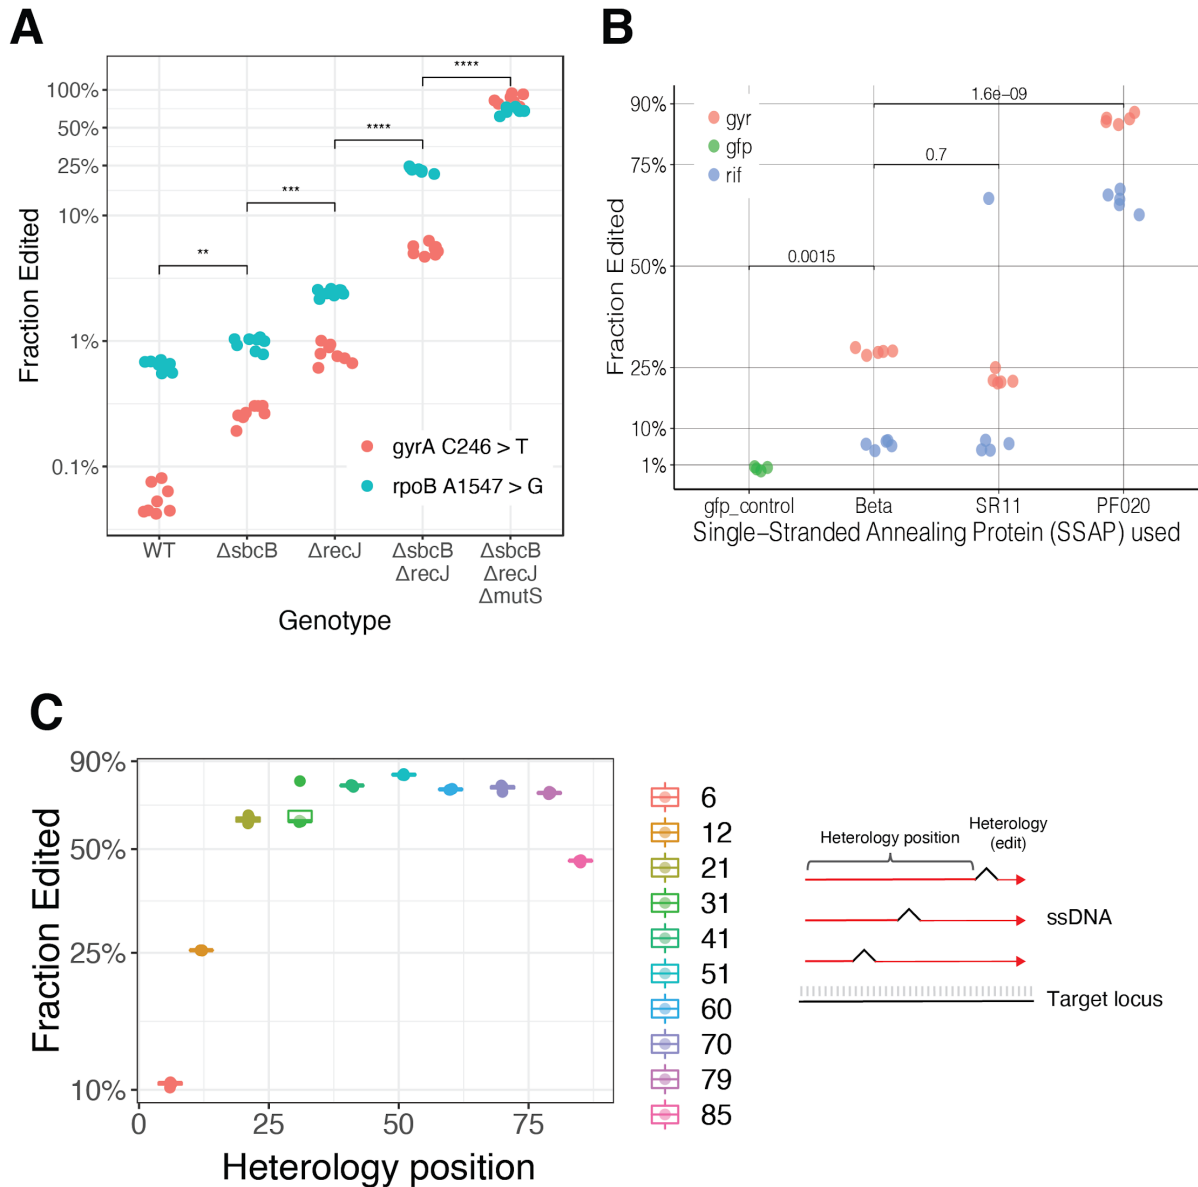

**Supplemental figure 6:**

**(A)** The effect of genotype on editing efficiency when the CspRecT is used rather than Beta as an SSAP. Individual measurements of the edited fraction of cells by amplicon sequencing are depicted by dots, for two loci. \*\*\*\* signifies  $p < 0.0001$ , \*\*\* signifies  $p < 0.001$ , and \*\* signifies  $p < 0.01$ , for two-tailed unpaired t-tests performed for comparisons indicated in brackets.

**(B)** The effect of SSAP protein on editing efficiency. Edited fraction of cells after batch growth was measured by amplicon sequencing for two loci. Retron constructs used Beta, “SR11”, or CspRecT as their SSAP, or expressed only GFP as a negative control. Independent measurements are represented with dots, and p-values of two-tailed, unpaired t-tests are given for the comparisons shown.

**(C)** The effect of heterology position within a 90-mer donor DNA was determined for the *gyrA* 246 C>T mutation, using CspRecT as an SSAP. Donors conferring this

mutation were constructed with the heterologous mutation present in different locations within the donor, as indicated in the diagram. Individual cultures were grown and induced for approximately 20 generations. Box plots in the style of Tukey are shown, and the 4 replicate measurements are additionally represented with dots.

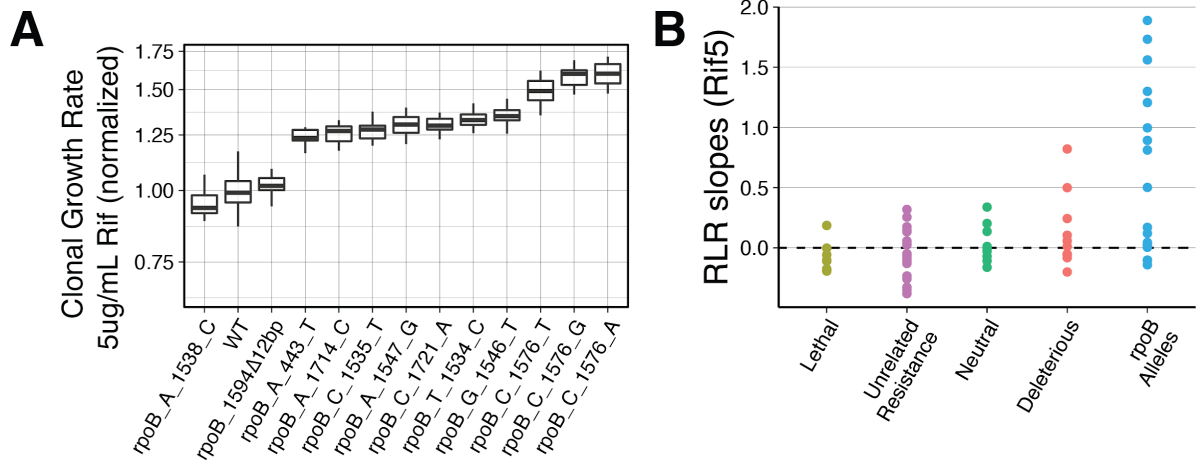

**Supplemental Figure 7:**

**(A)** *rpoB* mutants conferring rifampicin resistance were constructed in the  $\Delta mutS \Delta recJ \Delta sbcB$  background via oligonucleotide recombineering<sup>3</sup>, and growth rates were measured in batch growth with sub-inhibitory rifampicin (5ug/ml). Data is shown normalized to the parental (WT,  $\Delta mutS \Delta recJ \Delta sbcB$ ) growth rate.

**(B)** Summary of RLR enrichment observed in a pooled, quantitative experiment over time. RLR enrichment rate (slope) for all alleles across 3 replicate experiments is indicated by a dot, and different classes of mutants are separated by color.

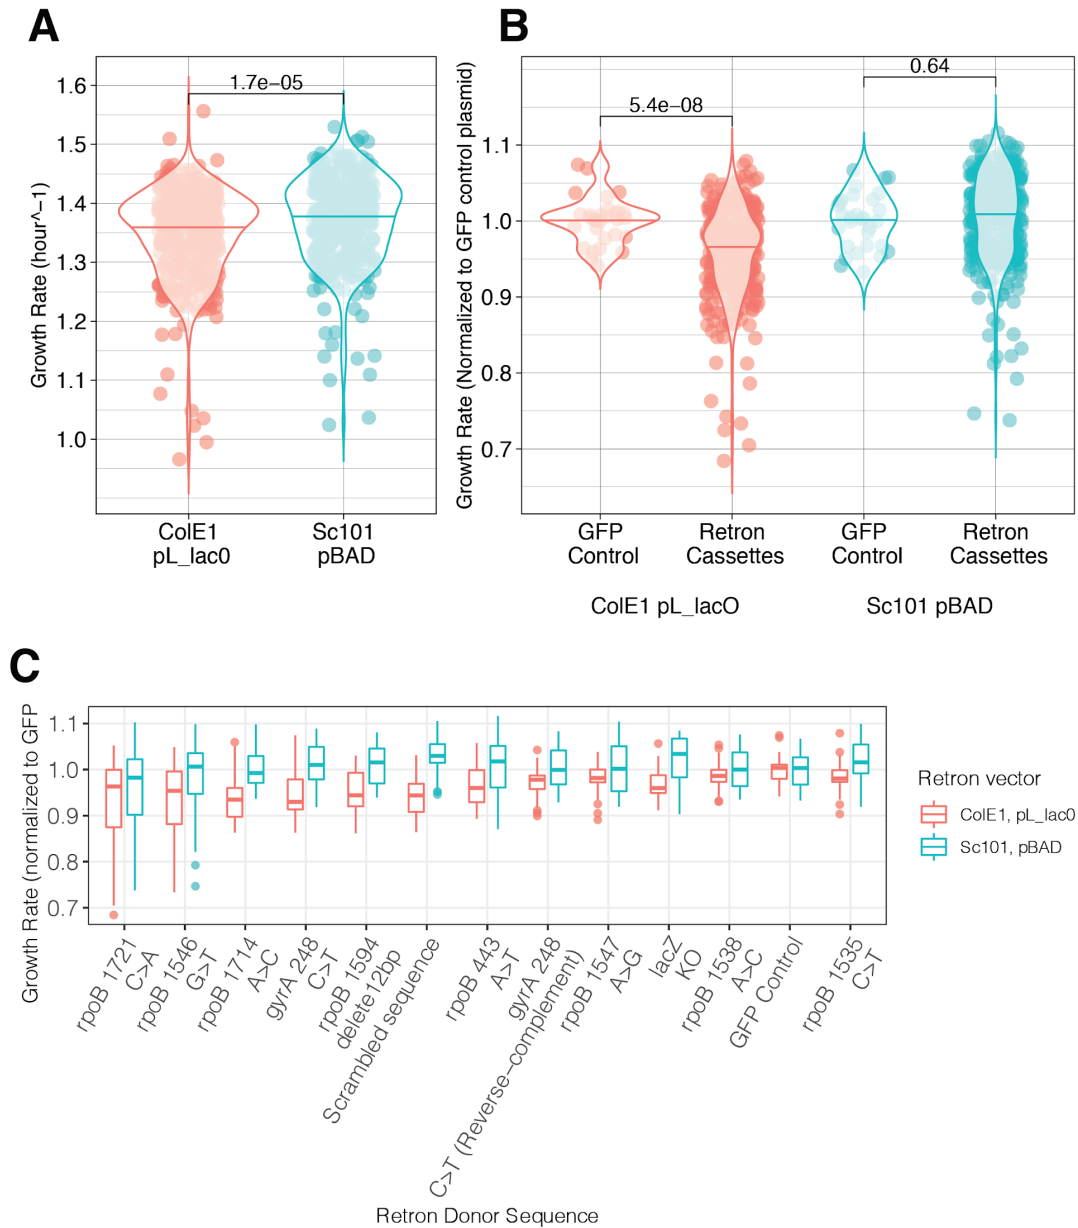

### Supplemental Figure 8:

**(A)** Where previous studies used a medium-copy ColE1 vector and pL\_lacO promoter for expression of the retron components, expression from a low-copy (sc101) vector is less detrimental to growth. Absolute growth rates are pooled here for 12 expressed retron constructs, and violin plot outlines depict the distribution of the data, with the width of outlines indicating the proportion of the data with a given value. Horizontal lines depict the mean growth rate for each vector type. P value for a t-test comparing data for both vector types is given.

**(B)** Retrons are expressed from the ColE1 vector, they are significantly depressed in growth rate compared to sfGFP expressed in the same manner, whereas 12 retons expressed from the SC101 vector cannot be distinguished, as a population. Growth rate is

shown normalized to the GFP control construct for each vector type, and horizontal lines depict the mean growth rate for each condition. P values for t-tests are given for the comparisons indicated with brackets.

(C) Growth rates for 12 induced retron constructs, normalized to the GFP-expressing control plasmid for each vector type. Constructs are ordered by mean growth rate, and box-and-whisker plots are depicted in the style of Tukey, with outlier observations represented by dots.

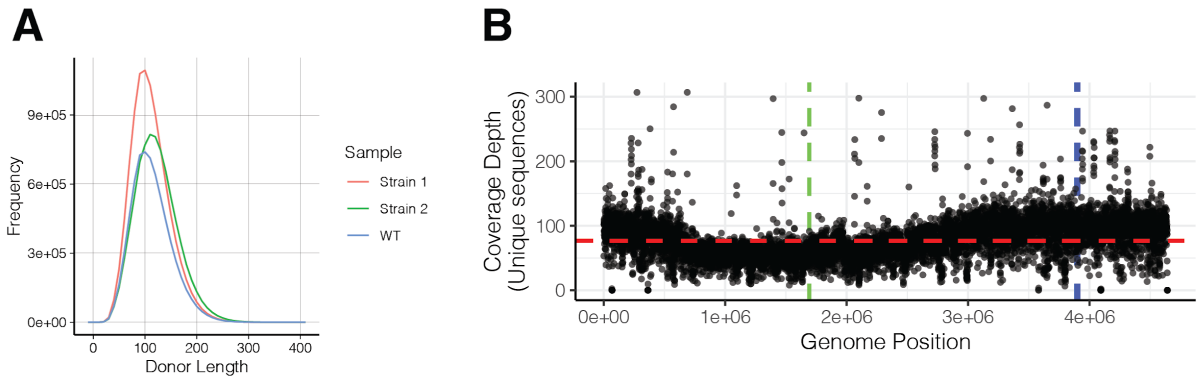

### Supplemental Figure 9

**(A)** Retron donor size distribution for three representative genomic DNA libraries. Strains 1 and 2 were evolved, Trimethoprim-resistant *E. coli*, and “WT” is *E. coli* MG1655.

**(B)** Depth of coverage of a representative genomic retron library is depicted. Dots indicate the mean coverage of unique retron donor sequences across 500bp windows of the genome. The mean coverage across all windows is 78, and is indicated with a dashed red line. Dashed gray lines mark the genomic positions of the origin and terminus of the genome, helping to clarify increased coverage as DNA content increases with proximity to the origin.

**Supplemental Table S1 (Supplemental sequences):** annotated list of selected oligonucleotides used in the study

| oligonucleotide name          | oligonucleotide sequence                                                                         | oligonucleotide description                    |
|-------------------------------|--------------------------------------------------------------------------------------------------|------------------------------------------------|
| TetA_K<br>O_tetR<br>_bla_F    | CTCGCAGAAAGAAACATATCCATGAAATCCCGC<br>CCCGAATTCATatgaccgatgatgaagaaaagaatttgaaactagtt<br>a        | integrate bla at $\lambda$ :tetR of ECNR1, Fwd |
| TetA_K<br>O_tetR<br>_bla_R    | CATTATTTGCCGACTACCTTGGTGATCTCGCCTT<br>TCACGTAGTGGACAAAActgtataaaaaaggatcaattttgaact<br>ctctccc   | integrate bla at $\lambda$ :tetR of ECNR1, Rev |
| araBAD<br>fwd<br>(kanfrt)     | GAGCGTGACCAGGTTGTGTTTTGGCAGCGCCAG<br>GTTGGCTATTCCGGGGATCCGTCGACC                                 | inactivate araBAD, Fwd                         |
| arabad<br>rev                 | CTGACGCTTTTTATCGCAACTCTCTACTGTTTCTC<br>CATACTGTAGGCTGGAGCTGCTTCG                                 | inactivate araBAD, Rev                         |
| mutSka<br>n_total_<br>del_fwd | CTAACAATTCCCGATAGTCTTTTGCTATCGGGAA<br>TATTAACGACGAATTCAGGAAACCCG                                 | mutS inactivate, Fwd                           |
| mutSka<br>n_total_<br>del_rev | GGTTATGTCCGGTTCCTGATATTAATGGGGTG<br>TGATGGGAATTCAGGAAAACAGACAG                                   | mutS inactivate, Rev                           |
| oMS_0<br>178                  | g*a*ggcaattcagcgggcaagtctgccgttcatcgacttcagTTATC<br>Aaagttgatctgttgttcacgcaattattaccgctggt       | recJ inactivation oligo                        |
| oMS_0<br>179                  | g*g*cagacagcagaataacggatttaacctaataatgatgaatgacTAATG<br>Acaacaatctaccttttgttcacgattacgaaacctttgg | sbcB inactivation oligo                        |
| oMS_7<br>33                   | CCTACACGACGCTCTTCCGATCTNGTTACCCTGA<br>CCGTCTACCAG                                                | gyrA fwd genomic PCR1                          |
| oMS_7<br>34                   | CCTACACGACGCTCTTCCGATCTNNGTTACCCTG<br>ACCGTCTACCAG                                               |                                                |
| oMS_7<br>44                   | CCTACACGACGCTCTTCCGATCTNNGTTACCCT<br>GACCGTCTACCAG                                               |                                                |
| oMS_7<br>39                   | GAGTTCAGACGTGTGCTCTTCCGATCTNNCTGGA<br>ACAAAGCCTATAAAAAATCTGCC                                    | gyrA rev genomic PCR1                          |

|                            |                                                                |                                                            |
|----------------------------|----------------------------------------------------------------|------------------------------------------------------------|
| oMS_7<br>40                | GAGTTCAGACGTGTGCTCTTCCGATCTNCTGGAA<br>CAAAGCCTATAAAAAATCTGCC   |                                                            |
| oMS_7<br>45                | GAGTTCAGACGTGTGCTCTTCCGATCTNNNCTGG<br>AACAAAGCCTATAAAAAATCTGCC |                                                            |
| oMS_7<br>29                | CCTACACGACGCTCTTCCGATCTNCTGATGCCAC<br>AGGATATGATCAACG          | rpoB fwd genomic<br>PCR1                                   |
| oMS_7<br>30                | CCTACACGACGCTCTTCCGATCTNNCTGATGCCA<br>CAGGATATGATCAACG         |                                                            |
| oMS_7<br>35                | GAGTTCAGACGTGTGCTCTTCCGATCTNNGAGT<br>GCGGAGATACGACGTTTG        | rpoB rev genomic PCR1                                      |
| oMS_7<br>36                | GAGTTCAGACGTGTGCTCTTCCGATCTNGAGTGC<br>GGAGATACGACGTTTG         |                                                            |
| retron_<br>donor_f<br>wd_1 | cctacacgacgcttccgatctNNTCTGAGTTACTGTCTGTT<br>TTCCTGAATTC       | for amplification of<br>retron donors from<br>plasmid, Fwd |
| retron_<br>donor_f<br>wd_2 | cctacacgacgcttccgatctNNBTCTGAGTTACTGTCTGT<br>TTCCTGAATTC       |                                                            |
| retron_<br>donor_f<br>wd_3 | cctacacgacgcttccgatctNNNHTCTGAGTTACTGTCTG<br>TTTTCTGAATTC      |                                                            |
| retron_<br>donor_f<br>wd_4 | cctacacgacgcttccgatctNNNNBTCTGAGTTACTGTCT<br>GTTTTCTGAATTC     |                                                            |
| retron_<br>donor_f<br>wd_5 | cctacacgacgcttccgatctTCTGAGTTACTGTCTGTTTT<br>CCTGAATTC         |                                                            |
| retron_<br>donor_r<br>ev_1 | gagttcagacgtgtgcttccgatctNAAGTGTTCAAATATTC<br>AGCGGATTTTCATG   | for amplification of<br>retron donors from<br>plasmid, Rev |
| retron_<br>donor_r<br>ev_2 | gagttcagacgtgtgcttccgatctNVAAGTGTTCAAATATT<br>CAGCGGATTTTCATG  |                                                            |
| retron_<br>donor_r<br>ev_3 | gagttcagacgtgtgcttccgatctNNVAAGTGTTCAAATAT<br>TCAGCGGATTTTCATG |                                                            |



|                            |                                                               |                                                     |
|----------------------------|---------------------------------------------------------------|-----------------------------------------------------|
| retron_<br>donor_r<br>ev_4 | gagttcagacgtgtgcttccgatctNNNDAAGTGTTCAAATA<br>TTCAGCGGATTCATG |                                                     |
| murF<br>fwd                | cctacacgacgcttccgatctACGATTTTAGTTAAGGGTTC<br>ACGTAG           | for amplification of<br>TAG>TAA loci from<br>genome |
| yafF<br>fwd                | cctacacgacgcttccgatctTGCGAAAAGCAGCCATGGA<br>C                 |                                                     |
| pgpA<br>fwd                | cctacacgacgcttccgatctCGCAGGCATCCTGTATTTTA<br>TCG              |                                                     |
| sucB<br>fwd                | cctacacgacgcttccgatctGCGAATCCGTGGGCTTCCTG                     |                                                     |
| lolA<br>fwd                | cctacacgacgcttccgatctCTGTGGATGCAGCGAAATTT<br>AC               |                                                     |
| lpxK<br>fwd                | cctacacgacgcttccgatctGTAGACGCACAGCTTTCAG<br>G                 |                                                     |
| fabH<br>fwd                | cctacacgacgcttccgatctTAAGCCGGGGCAGTTGGTT<br>C                 |                                                     |
| hemA<br>fwd                | cctacacgacgcttccgatctCCAACGAAATCACTTCAAC<br>AGG               |                                                     |
| fliN<br>fwd                | cctacacgacgcttccgatctGTTGCCGATAAATATGGCGT<br>G                |                                                     |
| hda fwd                    | cctacacgacgcttccgatctccGGCCTACGAATACTATGG<br>ATTAAC           |                                                     |
| mreC<br>fwd                | cctacacgacgcttccgatctGGAAAACAATCAGGTTATC<br>CGGC              |                                                     |
| coaD<br>fwd                | cctacacgacgcttccgatctCTCTTCATCGTTGGTGAAAG<br>AGG              |                                                     |
| murF<br>rev                | gagttcagacgtgtgcttccgatctCGATGGCGCGAAACGTC<br>AG              |                                                     |
| yafF rev                   | gagttcagacgtgtgcttccgatctAAAGTTTCCGGCATGGC<br>AGG             |                                                     |
| pgpA<br>rev                | gagttcagacgtgtgcttccgatctCGAACTGGAAACGCCGT<br>ATAAAC          |                                                     |

|             |                                                                                                      |                                                                      |
|-------------|------------------------------------------------------------------------------------------------------|----------------------------------------------------------------------|
| sucB<br>rev | gagttcagacgtgtgctcttccgatctCTTCAATTGCCGGAGAA<br>GGC                                                  |                                                                      |
| lolA rev    | gagttcagacgtgtgctcttccgatctCTAAATTTTCTGGCCGCA<br>TACG                                                |                                                                      |
| lpxK<br>rev | gagttcagacgtgtgctcttccgatctATTACGCGCATCAGCAA<br>GG                                                   |                                                                      |
| fabH<br>rev | gagttcagacgtgtgctcttccgatctGCCAGCATTCCAACGGT<br>TTG                                                  |                                                                      |
| hemA<br>rev | gagttcagacgtgtgctcttccgatctGCTTCCAGTTTGGCAAC<br>GATAG                                                |                                                                      |
| fliN rev    | gagttcagacgtgtgctcttccgatctGGGCAATAATGGCGATG<br>AGTG                                                 |                                                                      |
| hda rev     | gagttcagacgtgtgctcttccgatctATCAGTTGGATCGTGCG<br>TCG                                                  |                                                                      |
| mreC<br>rev | gagttcagacgtgtgctcttccgatctTCTCCACAAAGGGCTAC<br>GCC                                                  |                                                                      |
| coaD<br>rev | gagttcagacgtgtgctcttccgatcttGCCAGAAGTAATTCATG<br>CGC                                                 |                                                                      |
| oMS_8<br>90 | /5Phos/GAATTCAGGAAAACAGAGAGACCgAACT<br>CCAGTCUACACTCTACACGctGGTCTCGTTTCCTG<br>AATTC*T                | Custom Hairpin adapter,<br>ligates to TA-tailed<br>genomic fragments |
| oMS_8<br>88 | GACTGGAGTTcGGTCTCTCTGT                                                                               | 5prime fwd primer for<br>amplifying genomic<br>fragments             |
| oMS_8<br>89 | ACACTCTACACGctGGTCTCG                                                                                | 3prime rev primer for<br>amplifying genomic<br>fragments             |
| oMS_8<br>91 | ATTCAGGTCTCGGAAACCCGTTTTTTCTGACG                                                                     | genomic Vector Fwd, for<br>genomic insert retron<br>vector           |
| oMS_8<br>92 | TATAGGTCTCAACAGACAGTAACTCAGATTCAA<br>TGC                                                             | genomic Vector Rev, for<br>genomic insert retron<br>vector           |
| oMS_9<br>57 | T*A*AAAAAAATTGTCGCCACTATACGTAAAGCG<br>TAAACCGTCGTCaACTGGTGCGAGGATGATGTTG<br>AGGAAAATTTTATATTCTGCTGGC | MAGE oligo for<br>introduction of [C-<br>>t].49764 mutation          |

(folA region)

|             |                                                                                                      |                                                                              |
|-------------|------------------------------------------------------------------------------------------------------|------------------------------------------------------------------------------|
| oMS_9<br>58 | C*A*GGTATGGCGGCCATAATCACGGGTTTATT<br>TAAGGTGTTGCGTTTAAACCAGGCGAGcTCGGC<br>AGGCAGGTTCCACGGCATGGCGTTT  | MAGE oligo for<br>introduction of [T-<br>>g].49902 mutation<br>(folA region) |
| oMS_9<br>59 | A*A*TTCTATACAAAATTACCGCCGCTCCAGAAT<br>CTCAcAGCAATAGCTGTGAGAGTTCTGCGCATCA<br>GCATCGTGGAATTCGCTGAATACC | MAGE oligo for<br>introduction of [T-<br>>g].50279 mutation<br>(folA region) |
| oMS_9<br>60 | G*T*GCGTAATCTCAGACAGCGGGTTGTTCTGGT<br>CCATAAACTGAGGCAGCTGGCTGGAACCGAAGA<br>ACTCTTTCACTGCTGCGGAAATCGG | MAGE oligo for<br>introduction of<br>rpoB_1547A.G mutation                   |
| oMS_9<br>61 | A*G*ATACGACGTTTGTGCGTAATCTCAGACAGC<br>GGGTTGTTCTGGCCATAAACTGAGACAGCTGG<br>CTGGAACCGAAGAACTCTTTCACTG  | MAGE oligo for<br>introduction of<br>rpoB_1534T.C mutation                   |
| oMS_9<br>62 | C*C*GTAGTGAGTCGGGTGTACGTCTCGAACTTC<br>GAAGCCTGCACGATCACGGGTCAGACCGCCTGG<br>GCCGAGTGCGGAGATACGACGTTTG | MAGE oligo for<br>introduction of<br>rpoB_A_1623_T<br>mutation               |
| oMS_9<br>63 | C*G*GACCTTCAGGGGTTTCGATTGGACATACGC<br>GACCGTAGTGAGCCGGGTGTACGTCTCGAACTT<br>CGAAGCCTGCACGTTACGGGTCAG  | MAGE oligo for<br>introduction of<br>rpoB_A_1657_G<br>mutation               |
| oMS_9<br>64 | C*G*GACCTTCAGGGGTTTCGATTGGACATACGC<br>GACCGTAGTGAGACGGGTGTACGTCTCGAACTT<br>CGAAGCCTGCACGTTACGGGTCAG  | MAGE oligo for<br>introduction of<br>rpoB_A_1657_T<br>mutation               |
| oMS_9<br>65 | A*C*GGGTCAGACCGCCTGGGCCGAGTGCGGAG<br>ATACGACGTTTGTTCGTAATCTCAGACAGCGGG<br>TTGTTCTGGTCCATAAACTGAGACAG | MAGE oligo for<br>introduction of<br>rpoB_C_1576_A<br>mutation               |
| oMS_9<br>66 | A*C*GGGTCAGACCGCCTGGGCCGAGTGCGGAG<br>ATACGACGTTTGTCCGTAATCTCAGACAGCGGG<br>TTGTTCTGGTCCATAAACTGAGACAG | MAGE oligo for<br>introduction of<br>rpoB_C_1576_G<br>mutation               |
| oMS_9<br>67 | C*G*GGTCAGACCGCCTGGGCCGAGTGCGGAGA<br>TACGACGTTTGTACGTAATCTCAGACAGCGGGT<br>TGTTCTGGTCCATAAACTGAGACAGC | MAGE oligo for<br>introduction of<br>rpoB_C_1576_T                           |

|                  |                                                                                                      | mutation                                                         |
|------------------|------------------------------------------------------------------------------------------------------|------------------------------------------------------------------|
| oMS_9<br>68      | C*G*GGTCAGACCGCCTGGGCCGAGTGCGGAGA<br>TACGACGTTTGTGAATAATCTCAGACAGCGGGT<br>TGTTCTGGTCCATAAACTGAGACAGC | MAGE oligo for<br>introduction of<br>rpoB_CG_1574_TT<br>mutation |
| oMS_9<br>69      | A*T*ACGACGTTTGTGCGTAATCTCAGACAGCGG<br>GTTGTTCTGGTCTATAAACTGAGACAGCTGGCTG<br>GAACCGAAGAACTCTTTCCTGCT  | MAGE oligo for<br>introduction of<br>rpoB_G_1545_A<br>mutation   |
| oMS_9<br>70      | A*T*ACGACGTTTGTGCGTAATCTCAGACAGCGG<br>GTTGTTCTGGTCAATAAACTGAGACAGCTGGCT<br>GGAACCGAAGAACTCTTTCCTGCT  | MAGE oligo for<br>introduction of<br>rpoB_G_1545_T<br>mutation   |
| i5_2_1           | aatgatacggcgaccaccgagatctacacaagccattacactctttccctacac<br>gacgctctccgat                              | Custom Illumina i5<br>index 2_1                                  |
| i5_2_2           | aatgatacggcgaccaccgagatctacacttcggtaaacactctttccctacacg<br>acgctctccgat                              | Custom Illumina i5<br>index 2_2                                  |
| i5_2_3           | aatgatacggcgaccaccgagatctacacTATAGCCTacactctttccct<br>acacgacgctctccgat                              | Custom Illumina i5<br>index 2_3                                  |
| i5_2_4           | aatgatacggcgaccaccgagatctacacATAGAGGCacactctttccc<br>tacacgacgctctccgat                              | Custom Illumina i5<br>index 2_4                                  |
| i5_2_5           | aatgatacggcgaccaccgagatctacacCCTATCCTacactctttccct<br>acacgacgctctccgat                              | Custom Illumina i5<br>index 2_5                                  |
| i5_2_6           | aatgatacggcgaccaccgagatctacacGGCTCTGAacactctttccct<br>acacgacgctctccgat                              | Custom Illumina i5<br>index 2_6                                  |
| i5_2_7           | aatgatacggcgaccaccgagatctacacAGGCGAAGacactctttccc<br>tacacgacgctctccgat                              | Custom Illumina i5<br>index 2_7                                  |
| i5_2_8           | aatgatacggcgaccaccgagatctacacTAATCTTAacactctttccct<br>acacgacgctctccgat                              | Custom Illumina i5<br>index 2_8                                  |
| i5_2_9           | aatgatacggcgaccaccgagatctacacCAGGACGTacactctttccc<br>tacacgacgctctccgat                              | Custom Illumina i5<br>index 2_9                                  |
| i5_2_10          | aatgatacggcgaccaccgagatctacacGTACTIONGACacactctttccct<br>acacgacgctctccgat                           | Custom Illumina i5<br>index 2_10                                 |
| PCR2_r<br>01_8me | CAAGCAGAAGACGGCATAACGAGATCCGTGAGA                                                                    | Custom Illumina i7<br>index 1 (A1)                               |

|                       |                                                                   |                                      |
|-----------------------|-------------------------------------------------------------------|--------------------------------------|
| r                     | GTGACTGGAGTTCAGACGTGTGCTCTT                                       |                                      |
| PCR2_r<br>02_8me<br>r | CAAGCAGAAGACGGCATAACGAGATCATCAAGTG<br>TGACTGGAGTTCAGACGTGTGCTCTT  | Custom Illumina i7<br>index 2 (A2)   |
| PCR2_r<br>03_8me<br>r | CAAGCAGAAGACGGCATAACGAGATAAAGACGGA<br>GTGACTGGAGTTCAGACGTGTGCTCTT | Custom Illumina i7<br>index 3 (A3)   |
| PCR2_r<br>04_8me<br>r | CAAGCAGAAGACGGCATAACGAGATCGAACTTAG<br>TGACTGGAGTTCAGACGTGTGCTCTT  | Custom Illumina i7<br>index 4 (A4)   |
| PCR2_r<br>05_8me<br>r | CAAGCAGAAGACGGCATAACGAGATGATAGACA<br>GTGACTGGAGTTCAGACGTGTGCTCTT  | Custom Illumina i7<br>index 5 (A5)   |
| PCR2_r<br>06_8me<br>r | CAAGCAGAAGACGGCATAACGAGATGGTGCGAA<br>GTGACTGGAGTTCAGACGTGTGCTCTT  | Custom Illumina i7<br>index 6 (A6)   |
| PCR2_r<br>07_8me<br>r | CAAGCAGAAGACGGCATAACGAGATCACCTTACG<br>TGACTGGAGTTCAGACGTGTGCTCTT  | Custom Illumina i7<br>index 7 (A7)   |
| PCR2_r<br>08_8me<br>r | CAAGCAGAAGACGGCATAACGAGATCCTAATCCG<br>TGACTGGAGTTCAGACGTGTGCTCTT  | Custom Illumina i7<br>index 8 (A8)   |
| PCR2_r<br>09_8me<br>r | CAAGCAGAAGACGGCATAACGAGATAACGTGAT<br>GTGACTGGAGTTCAGACGTGTGCTCTT  | Custom Illumina i7<br>index 9 (A9)   |
| PCR2_r<br>10_8me<br>r | CAAGCAGAAGACGGCATAACGAGATAGTACAAG<br>GTGACTGGAGTTCAGACGTGTGCTCTT  | Custom Illumina i7<br>index 10 (A10) |
| PCR2_r<br>11_8me<br>r | CAAGCAGAAGACGGCATAACGAGATAACCGAGA<br>GTGACTGGAGTTCAGACGTGTGCTCTT  | Custom Illumina i7<br>index 11 (A11) |
| PCR2_r<br>12_8me<br>r | CAAGCAGAAGACGGCATAACGAGATAACGCTTAG<br>TGACTGGAGTTCAGACGTGTGCTCTT  | Custom Illumina i7<br>index 12 (A12) |
| PCR2_r<br>13_8me      | CAAGCAGAAGACGGCATAACGAGATAAGGTACA                                 | Custom Illumina i7<br>index 13 (B1)  |

|                       |                                                                  |                                      |
|-----------------------|------------------------------------------------------------------|--------------------------------------|
| r                     | GTGACTGGAGTTCAGACGTGTGCTCTT                                      |                                      |
| PCR2_r<br>14_8me<br>r | CAAGCAGAAGACGGCATAACGAGATACAGCAGA<br>GTGACTGGAGTTCAGACGTGTGCTCTT | Custom Illumina i7<br>index 14 (B2)  |
| PCR2_r<br>15_8me<br>r | CAAGCAGAAGACGGCATAACGAGATACCTCCAAG<br>TGACTGGAGTTCAGACGTGTGCTCTT | Custom Illumina i7<br>index 15 (B3)  |
| PCR2_r<br>16_8me<br>r | CAAGCAGAAGACGGCATAACGAGATACGTATCAG<br>TGACTGGAGTTCAGACGTGTGCTCTT | Custom Illumina i7<br>index 16 (B4)  |
| PCR2_r<br>17_8me<br>r | CAAGCAGAAGACGGCATAACGAGATACTATGCAG<br>TGACTGGAGTTCAGACGTGTGCTCTT | Custom Illumina i7<br>index 17 (B5)  |
| PCR2_r<br>18_8me<br>r | CAAGCAGAAGACGGCATAACGAGATAGAGTCAA<br>GTGACTGGAGTTCAGACGTGTGCTCTT | Custom Illumina i7<br>index 18 (B6)  |
| PCR2_r<br>19_8me<br>r | CAAGCAGAAGACGGCATAACGAGATAGCAGGAA<br>GTGACTGGAGTTCAGACGTGTGCTCTT | Custom Illumina i7<br>index 19 (B7)  |
| PCR2_r<br>20_8me<br>r | CAAGCAGAAGACGGCATAACGAGATCAACCACA<br>GTGACTGGAGTTCAGACGTGTGCTCTT | Custom Illumina i7<br>index 20 (B8)  |
| PCR2_r<br>21_8me<br>r | CAAGCAGAAGACGGCATAACGAGATCAAGACTA<br>GTGACTGGAGTTCAGACGTGTGCTCTT | Custom Illumina i7<br>index 21 (B9)  |
| PCR2_r<br>22_8me<br>r | CAAGCAGAAGACGGCATAACGAGATCAATGGAA<br>GTGACTGGAGTTCAGACGTGTGCTCTT | Custom Illumina i7<br>index 22 (B10) |
| PCR2_r<br>23_8me<br>r | CAAGCAGAAGACGGCATAACGAGATCACTTCGAG<br>TGACTGGAGTTCAGACGTGTGCTCTT | Custom Illumina i7<br>index 23 (B11) |
| PCR2_r<br>24_8me<br>r | CAAGCAGAAGACGGCATAACGAGATCAGCGTTAG<br>TGACTGGAGTTCAGACGTGTGCTCTT | Custom Illumina i7<br>index 24 (B12) |
| PCR2_r<br>25_8me      | CAAGCAGAAGACGGCATAACGAGATCATAACAA                                | Custom Illumina i7<br>index 25 (C1)  |

|                       |                                                                   |                                      |
|-----------------------|-------------------------------------------------------------------|--------------------------------------|
| r                     | GTGACTGGAGTTCAGACGTGTGCTCTT                                       |                                      |
| PCR2_r<br>26_8me<br>r | CAAGCAGAAGACGGCATAACGAGATCCAGTTCAG<br>TGACTGGAGTTCAGACGTGTGCTCTT  | Custom Illumina i7<br>index 26 (C2)  |
| PCR2_r<br>27_8me<br>r | CAAGCAGAAGACGGCATAACGAGATCCGAAGTA<br>GTGACTGGAGTTCAGACGTGTGCTCTT  | Custom Illumina i7<br>index 27 (C3)  |
| PCR2_r<br>28_8me<br>r | CAAGCAGAAGACGGCATAACGAGATCCTCCTGAG<br>TGACTGGAGTTCAGACGTGTGCTCTT  | Custom Illumina i7<br>index 28 (C4)  |
| PCR2_r<br>29_8me<br>r | CAAGCAGAAGACGGCATAACGAGATCGCATAACA<br>GTGACTGGAGTTCAGACGTGTGCTCTT | Custom Illumina i7<br>index 29 (C5)  |
| PCR2_r<br>30_8me<br>r | CAAGCAGAAGACGGCATAACGAGATCTGAGCCA<br>GTGACTGGAGTTCAGACGTGTGCTCTT  | Custom Illumina i7<br>index 30 (C6)  |
| PCR2_r<br>31_8me<br>r | CAAGCAGAAGACGGCATAACGAGATCTGGCATAG<br>TGACTGGAGTTCAGACGTGTGCTCTT  | Custom Illumina i7<br>index 31 (C7)  |
| PCR2_r<br>32_8me<br>r | CAAGCAGAAGACGGCATAACGAGATGAATCTGA<br>GTGACTGGAGTTCAGACGTGTGCTCTT  | Custom Illumina i7<br>index 32 (C8)  |
| PCR2_r<br>33_8me<br>r | CAAGCAGAAGACGGCATAACGAGATGAGCTGAA<br>GTGACTGGAGTTCAGACGTGTGCTCTT  | Custom Illumina i7<br>index 33 (C9)  |
| PCR2_r<br>34_8me<br>r | CAAGCAGAAGACGGCATAACGAGATGCCACATA<br>GTGACTGGAGTTCAGACGTGTGCTCTT  | Custom Illumina i7<br>index 34 (C10) |
| PCR2_r<br>35_8me<br>r | CAAGCAGAAGACGGCATAACGAGATGCGAGTAA<br>GTGACTGGAGTTCAGACGTGTGCTCTT  | Custom Illumina i7<br>index 35 (C11) |
| PCR2_r<br>36_8me<br>r | CAAGCAGAAGACGGCATAACGAGATGCTAACGA<br>GTGACTGGAGTTCAGACGTGTGCTCTT  | Custom Illumina i7<br>index 36 (C12) |
| PCR2_r<br>37_8me      | CAAGCAGAAGACGGCATAACGAGATGCTCGGTAG                                | Custom Illumina i7<br>index 37 (D1)  |

|                       |                                                                  |                                      |
|-----------------------|------------------------------------------------------------------|--------------------------------------|
| r                     | TGACTGGAGTTCAGACGTGTGCTCTT                                       |                                      |
| PCR2_r<br>38_8me<br>r | CAAGCAGAAGACGGCATAACGAGATGGAGAACA<br>GTGACTGGAGTTCAGACGTGTGCTCTT | Custom Illumina i7<br>index 38 (D2)  |
| PCR2_r<br>39_8me<br>r | CAAGCAGAAGACGGCATAACGAGATGTACGCAA<br>GTGACTGGAGTTCAGACGTGTGCTCTT | Custom Illumina i7<br>index 39 (D3)  |
| PCR2_r<br>40_8me<br>r | CAAGCAGAAGACGGCATAACGAGATGTCGTAGA<br>GTGACTGGAGTTCAGACGTGTGCTCTT | Custom Illumina i7<br>index 40 (D4)  |
| PCR2_r<br>41_8me<br>r | CAAGCAGAAGACGGCATAACGAGATGTCTGTCAG<br>TGACTGGAGTTCAGACGTGTGCTCTT | Custom Illumina i7<br>index 41 (D5)  |
| PCR2_r<br>42_8me<br>r | CAAGCAGAAGACGGCATAACGAGATTAGGATGA<br>GTGACTGGAGTTCAGACGTGTGCTCTT | Custom Illumina i7<br>index 42 (D6)  |
| PCR2_r<br>43_8me<br>r | CAAGCAGAAGACGGCATAACGAGATTATCAGCAG<br>TGACTGGAGTTCAGACGTGTGCTCTT | Custom Illumina i7<br>index 43 (D7)  |
| PCR2_r<br>44_8me<br>r | CAAGCAGAAGACGGCATAACGAGATTCCGTCTAG<br>TGACTGGAGTTCAGACGTGTGCTCTT | Custom Illumina i7<br>index 44 (D8)  |
| PCR2_r<br>45_8me<br>r | CAAGCAGAAGACGGCATAACGAGATTCTTCACAG<br>TGACTGGAGTTCAGACGTGTGCTCTT | Custom Illumina i7<br>index 45 (D9)  |
| PCR2_r<br>46_8me<br>r | CAAGCAGAAGACGGCATAACGAGATTGAAGAGA<br>GTGACTGGAGTTCAGACGTGTGCTCTT | Custom Illumina i7<br>index 46 (D10) |
| PCR2_r<br>47_8me<br>r | CAAGCAGAAGACGGCATAACGAGATTGGAACAA<br>GTGACTGGAGTTCAGACGTGTGCTCTT | Custom Illumina i7<br>index 47 (D11) |
| PCR2_r<br>48_8me<br>r | CAAGCAGAAGACGGCATAACGAGATTGGCTTCAG<br>TGACTGGAGTTCAGACGTGTGCTCTT | Custom Illumina i7<br>index 48 (D12) |
| PCR2_r<br>49_8me      | CAAGCAGAAGACGGCATAACGAGATTGGTGGTAG                               | Custom Illumina i7<br>index 49 (E1)  |



|                       |                                                                  |                                      |
|-----------------------|------------------------------------------------------------------|--------------------------------------|
| r                     | TGACTGGAGTTCAGACGTGTGCTCTT                                       |                                      |
| PCR2_r<br>50_8me<br>r | CAAGCAGAAGACGGCATAACGAGATTTACGCAG<br>TGACTGGAGTTCAGACGTGTGCTCTT  | Custom Illumina i7<br>index 50 (E2)  |
| PCR2_r<br>51_8me<br>r | CAAGCAGAAGACGGCATAACGAGATAATCCGTCG<br>TGACTGGAGTTCAGACGTGTGCTCTT | Custom Illumina i7<br>index 51 (E3)  |
| PCR2_r<br>52_8me<br>r | CAAGCAGAAGACGGCATAACGAGATAATGTTGCG<br>TGACTGGAGTTCAGACGTGTGCTCTT | Custom Illumina i7<br>index 52 (E4)  |
| PCR2_r<br>53_8me<br>r | CAAGCAGAAGACGGCATAACGAGATACACGACC<br>GTGACTGGAGTTCAGACGTGTGCTCTT | Custom Illumina i7<br>index 53 (E5)  |
| PCR2_r<br>54_8me<br>r | CAAGCAGAAGACGGCATAACGAGATACAGATTCG<br>TGACTGGAGTTCAGACGTGTGCTCTT | Custom Illumina i7<br>index 54 (E6)  |
| PCR2_r<br>55_8me<br>r | CAAGCAGAAGACGGCATAACGAGATAGATGTAC<br>GTGACTGGAGTTCAGACGTGTGCTCTT | Custom Illumina i7<br>index 55 (E7)  |
| PCR2_r<br>56_8me<br>r | CAAGCAGAAGACGGCATAACGAGATCAAGGAGC<br>GTGACTGGAGTTCAGACGTGTGCTCTT | Custom Illumina i7<br>index 56 (E8)  |
| PCR2_r<br>57_8me<br>r | CAAGCAGAAGACGGCATAACGAGATCCATCCTCG<br>TGACTGGAGTTCAGACGTGTGCTCTT | Custom Illumina i7<br>index 57 (E9)  |
| PCR2_r<br>58_8me<br>r | CAAGCAGAAGACGGCATAACGAGATCCGACAAC<br>GTGACTGGAGTTCAGACGTGTGCTCTT | Custom Illumina i7<br>index 58 (E10) |
| PCR2_r<br>59_8me<br>r | CAAGCAGAAGACGGCATAACGAGATCCTCTATCG<br>TGACTGGAGTTCAGACGTGTGCTCTT | Custom Illumina i7<br>index 59 (E11) |
| PCR2_r<br>60_8me<br>r | CAAGCAGAAGACGGCATAACGAGATCGACACAC<br>GTGACTGGAGTTCAGACGTGTGCTCTT | Custom Illumina i7<br>index 60 (E12) |
| PCR2_r<br>61_8me      | CAAGCAGAAGACGGCATAACGAGATCGGATTGCG                               | Custom Illumina i7<br>index 61 (F1)  |

|                       |                                                                   |                                      |
|-----------------------|-------------------------------------------------------------------|--------------------------------------|
| r                     | TGACTGGAGTTCAGACGTGTGCTCTT                                        |                                      |
| PCR2_r<br>62_8me<br>r | CAAGCAGAAGACGGCATAACGAGATGAACAGGC<br>GTGACTGGAGTTCAGACGTGTGCTCTT  | Custom Illumina i7<br>index 62 (F2)  |
| PCR2_r<br>63_8me<br>r | CAAGCAGAAGACGGCATAACGAGATGACAGTGC<br>GTGACTGGAGTTCAGACGTGTGCTCTT  | Custom Illumina i7<br>index 63 (F3)  |
| PCR2_r<br>64_8me<br>r | CAAGCAGAAGACGGCATAACGAGATGAGTTAGC<br>GTGACTGGAGTTCAGACGTGTGCTCTT  | Custom Illumina i7<br>index 64 (F4)  |
| PCR2_r<br>65_8me<br>r | CAAGCAGAAGACGGCATAACGAGATGATGAATC<br>GTGACTGGAGTTCAGACGTGTGCTCTT  | Custom Illumina i7<br>index 65 (F5)  |
| PCR2_r<br>66_8me<br>r | CAAGCAGAAGACGGCATAACGAGATGCCAAGAC<br>GTGACTGGAGTTCAGACGTGTGCTCTT  | Custom Illumina i7<br>index 66 (F6)  |
| PCR2_r<br>67_8me<br>r | CAAGCAGAAGACGGCATAACGAGATAACAAGCTA<br>GTGACTGGAGTTCAGACGTGTGCTCTT | Custom Illumina i7<br>index 67 (F7)  |
| PCR2_r<br>68_8me<br>r | CAAGCAGAAGACGGCATAACGAGATAAACATCG<br>GTGACTGGAGTTCAGACGTGTGCTCTT  | Custom Illumina i7<br>index 68 (F8)  |
| PCR2_r<br>69_8me<br>r | CAAGCAGAAGACGGCATAACGAGATACATTGGCG<br>TGACTGGAGTTCAGACGTGTGCTCTT  | Custom Illumina i7<br>index 69 (F9)  |
| PCR2_r<br>70_8me<br>r | CAAGCAGAAGACGGCATAACGAGATACCACTGTG<br>TGACTGGAGTTCAGACGTGTGCTCTT  | Custom Illumina i7<br>index 70 (F10) |
| PCR2_r<br>71_8me<br>r | CAAGCAGAAGACGGCATAACGAGATCGCTGATCG<br>TGACTGGAGTTCAGACGTGTGCTCTT  | Custom Illumina i7<br>index 71 (F11) |
| PCR2_r<br>72_8me<br>r | CAAGCAGAAGACGGCATAACGAGATCAGATCTGG<br>TGACTGGAGTTCAGACGTGTGCTCTT  | Custom Illumina i7<br>index 72 (F12) |
| PCR2_r<br>73_8me      | CAAGCAGAAGACGGCATAACGAGATCTGTAGCCG                                | Custom Illumina i7<br>index 73 (G1)  |

|                       |                                                                  |                                      |
|-----------------------|------------------------------------------------------------------|--------------------------------------|
| r                     | TGACTGGAGTTCAGACGTGTGCTCTT                                       |                                      |
| PCR2_r<br>74_8me<br>r | CAAGCAGAAGACGGCATAACGAGATAGTGGTCA<br>GTGACTGGAGTTCAGACGTGTGCTCTT | Custom Illumina i7<br>index 74 (G2)  |
| PCR2_r<br>75_8me<br>r | CAAGCAGAAGACGGCATAACGAGATAACAACCA<br>GTGACTGGAGTTCAGACGTGTGCTCTT | Custom Illumina i7<br>index 75 (G3)  |
| PCR2_r<br>76_8me<br>r | CAAGCAGAAGACGGCATAACGAGATACACAGAA<br>GTGACTGGAGTTCAGACGTGTGCTCTT | Custom Illumina i7<br>index 76 (G4)  |
| PCR2_r<br>77_8me<br>r | CAAGCAGAAGACGGCATAACGAGATACGCTCGA<br>GTGACTGGAGTTCAGACGTGTGCTCTT | Custom Illumina i7<br>index 77 (G5)  |
| PCR2_r<br>78_8me<br>r | CAAGCAGAAGACGGCATAACGAGATAGATCGCA<br>GTGACTGGAGTTCAGACGTGTGCTCTT | Custom Illumina i7<br>index 78 (G6)  |
| PCR2_r<br>79_8me<br>r | CAAGCAGAAGACGGCATAACGAGATAGTCACTAG<br>TGACTGGAGTTCAGACGTGTGCTCTT | Custom Illumina i7<br>index 79 (G7)  |
| PCR2_r<br>80_8me<br>r | CAAGCAGAAGACGGCATAACGAGATCGACTGGA<br>GTGACTGGAGTTCAGACGTGTGCTCTT | Custom Illumina i7<br>index 80 (G8)  |
| PCR2_r<br>81_8me<br>r | CAAGCAGAAGACGGCATAACGAGATCTCAATGAG<br>TGACTGGAGTTCAGACGTGTGCTCTT | Custom Illumina i7<br>index 81 (G9)  |
| PCR2_r<br>82_8me<br>r | CAAGCAGAAGACGGCATAACGAGATGACTAGTA<br>GTGACTGGAGTTCAGACGTGTGCTCTT | Custom Illumina i7<br>index 82 (G10) |
| PCR2_r<br>83_8me<br>r | CAAGCAGAAGACGGCATAACGAGATGTGTTCTAG<br>TGACTGGAGTTCAGACGTGTGCTCTT | Custom Illumina i7<br>index 83 (G11) |
| PCR2_r<br>84_8me<br>r | CAAGCAGAAGACGGCATAACGAGATAAATCACCG<br>TGACTGGAGTTCAGACGTGTGCTCTT | Custom Illumina i7<br>index 84 (G12) |
| PCR2_r<br>85_8me      | CAAGCAGAAGACGGCATAACGAGATAAGGACAC                                | Custom Illumina i7<br>index 85 (H1)  |

|                       |                                                                  |                                      |
|-----------------------|------------------------------------------------------------------|--------------------------------------|
| r                     | GTGACTGGAGTTCAGACGTGTGCTCTT                                      |                                      |
| PCR2_r<br>86_8me<br>r | CAAGCAGAAGACGGCATAACGAGATAGCACCTCG<br>TGACTGGAGTTCAGACGTGTGCTCTT | Custom Illumina i7<br>index 86 (H2)  |
| PCR2_r<br>87_8me<br>r | CAAGCAGAAGACGGCATAACGAGATAGCCATGC<br>GTGACTGGAGTTCAGACGTGTGCTCTT | Custom Illumina i7<br>index 87 (H3)  |
| PCR2_r<br>88_8me<br>r | CAAGCAGAAGACGGCATAACGAGATAGGCTAAC<br>GTGACTGGAGTTCAGACGTGTGCTCTT | Custom Illumina i7<br>index 88 (H4)  |
| PCR2_r<br>89_8me<br>r | CAAGCAGAAGACGGCATAACGAGATATCATTCCG<br>TGACTGGAGTTCAGACGTGTGCTCTT | Custom Illumina i7<br>index 89 (H5)  |
| PCR2_r<br>90_8me<br>r | CAAGCAGAAGACGGCATAACGAGATCTAAGGTCG<br>TGACTGGAGTTCAGACGTGTGCTCTT | Custom Illumina i7<br>index 90 (H6)  |
| PCR2_r<br>91_8me<br>r | CAAGCAGAAGACGGCATAACGAGATATGCCTAAG<br>TGACTGGAGTTCAGACGTGTGCTCTT | Custom Illumina i7<br>index 91 (H7)  |
| PCR2_r<br>92_8me<br>r | CAAGCAGAAGACGGCATAACGAGATATTGAGGA<br>GTGACTGGAGTTCAGACGTGTGCTCTT | Custom Illumina i7<br>index 92 (H8)  |
| PCR2_r<br>93_8me<br>r | CAAGCAGAAGACGGCATAACGAGATAAGAGATC<br>GTGACTGGAGTTCAGACGTGTGCTCTT | Custom Illumina i7<br>index 93 (H9)  |
| PCR2_r<br>94_8me<br>r | CAAGCAGAAGACGGCATAACGAGATATAGCGAC<br>GTGACTGGAGTTCAGACGTGTGCTCTT | Custom Illumina i7<br>index 94 (H10) |
| PCR2_r<br>95_8me<br>r | CAAGCAGAAGACGGCATAACGAGATATTGGCTCG<br>TGACTGGAGTTCAGACGTGTGCTCTT | Custom Illumina i7<br>index 95 (H11) |
| PCR2_r<br>96_8me<br>r | CAAGCAGAAGACGGCATAACGAGATATCCTGTAG<br>TGACTGGAGTTCAGACGTGTGCTCTT | Custom Illumina i7<br>index 96 (H12) |

**Supplemental table S2**: summarized data and source data for Figure 2B. Edited fraction across genotype and SSAP.

| genotype | locus | fraction_edited | ssap | well |
|----------|-------|-----------------|------|------|
| WT       | rpoB  | 9.32E-05        | Beta | A1   |
| WT       | rpoB  | 0.00016102      | Beta | A2   |
| WT       | rpoB  | 0.0001508       | Beta | A3   |
| WT       | rpoB  | 0.0001307       | Beta | A4   |
| WT       | rpoB  | 0.00017252      | Beta | A5   |
| WT       | rpoB  | 7.12E-05        | Beta | A6   |
| WT       | rpoB  | 0.00011803      | Beta | A7   |
| WT       | rpoB  | 0.00014323      | Beta | A8   |
| WT       | gyrA  | 3.75E-05        | Beta | E1   |
| WT       | gyrA  | 1.58E-05        | Beta | E2   |
| WT       | gyrA  | 5.26E-06        | Beta | E3   |
| WT       | gyrA  | 1.06E-05        | Beta | E4   |
| WT       | gyrA  | 2.66E-05        | Beta | E5   |
| WT       | gyrA  | 5.29E-06        | Beta | E6   |

|               |             |            |      |     |
|---------------|-------------|------------|------|-----|
| WT            | <i>gyrA</i> | 5.48E-06   | Beta | E7  |
| WT            | <i>gyrA</i> | 1.13E-05   | Beta | E8  |
| $\Delta$ mutS | <i>rpoB</i> | 0.00029032 | Beta | A9  |
| $\Delta$ mutS | <i>rpoB</i> | 0.00019444 | Beta | A10 |
| $\Delta$ mutS | <i>rpoB</i> | 0.00031214 | Beta | A11 |
| $\Delta$ mutS | <i>rpoB</i> | 0.00020312 | Beta | A12 |
| $\Delta$ mutS | <i>rpoB</i> | 0.00031395 | Beta | B9  |
| $\Delta$ mutS | <i>rpoB</i> | 0.00027199 | Beta | B10 |
| $\Delta$ mutS | <i>rpoB</i> | 0.00025501 | Beta | B11 |
| $\Delta$ mutS | <i>rpoB</i> | 0.00037342 | Beta | B12 |
| $\Delta$ mutS | <i>gyrA</i> | 0.00167809 | Beta | E9  |
| $\Delta$ mutS | <i>gyrA</i> | 0.00145778 | Beta | E10 |
| $\Delta$ mutS | <i>gyrA</i> | 0.00176807 | Beta | E11 |
| $\Delta$ mutS | <i>gyrA</i> | 0.0017596  | Beta | E12 |
| $\Delta$ mutS | <i>gyrA</i> | 0.00165089 | Beta | F9  |
| $\Delta$ mutS | <i>gyrA</i> | 0.00616607 | Beta | F10 |
| $\Delta$ mutS | <i>gyrA</i> | 0.00164878 | Beta | F11 |
| $\Delta$ mutS | <i>gyrA</i> | 0.00152824 | Beta | F12 |

|                                                           |      |            |      |     |
|-----------------------------------------------------------|------|------------|------|-----|
| $\Delta\text{mutS}, \Delta\text{recJ}$                    | rpoB | 0.00322439 | Beta | B1  |
| $\Delta\text{mutS}, \Delta\text{recJ}$                    | rpoB | 0.00291499 | Beta | B2  |
| $\Delta\text{mutS}, \Delta\text{recJ}$                    | rpoB | 0.00331901 | Beta | B3  |
| $\Delta\text{mutS}, \Delta\text{recJ}$                    | rpoB | 0.00294365 | Beta | B4  |
| $\Delta\text{mutS}, \Delta\text{recJ}$                    | rpoB | 0.00329234 | Beta | B5  |
| $\Delta\text{mutS}, \Delta\text{recJ}$                    | rpoB | 0.0032829  | Beta | B6  |
| $\Delta\text{mutS}, \Delta\text{recJ}$                    | rpoB | 0.00312337 | Beta | B7  |
| $\Delta\text{mutS}, \Delta\text{recJ}$                    | rpoB | 0.00352062 | Beta | B8  |
| $\Delta\text{mutS}, \Delta\text{recJ}$                    | gyrA | 0.03687721 | Beta | F1  |
| $\Delta\text{mutS}, \Delta\text{recJ}$                    | gyrA | 0.03631908 | Beta | F2  |
| $\Delta\text{mutS}, \Delta\text{recJ}$                    | gyrA | 0.04317863 | Beta | F3  |
| $\Delta\text{mutS}, \Delta\text{recJ}$                    | gyrA | 0.0344794  | Beta | F4  |
| $\Delta\text{mutS}, \Delta\text{recJ}$                    | gyrA | 0.03569975 | Beta | F5  |
| $\Delta\text{mutS}, \Delta\text{recJ}$                    | gyrA | 0.03528977 | Beta | F6  |
| $\Delta\text{mutS}, \Delta\text{recJ}$                    | gyrA | 0.03638852 | Beta | F7  |
| $\Delta\text{mutS}, \Delta\text{recJ}$                    | gyrA | 0.03654135 | Beta | F8  |
| $\Delta\text{mutS}, \Delta\text{recJ}, \Delta\text{sbcB}$ | rpoB | 0.06061889 | Beta | C9  |
| $\Delta\text{mutS}, \Delta\text{recJ}, \Delta\text{sbcB}$ | rpoB | 0.05995104 | Beta | C10 |

|                                                                 |      |            |      |     |
|-----------------------------------------------------------------|------|------------|------|-----|
| $\Delta\text{mutS}$ , $\Delta\text{recJ}$ , $\Delta\text{sbcB}$ | rpoB | 0.01053677 | Beta | C11 |
| $\Delta\text{mutS}$ , $\Delta\text{recJ}$ , $\Delta\text{sbcB}$ | rpoB | 0.05843985 | Beta | C12 |
| $\Delta\text{mutS}$ , $\Delta\text{recJ}$ , $\Delta\text{sbcB}$ | rpoB | 0.05923514 | Beta | D1  |
| $\Delta\text{mutS}$ , $\Delta\text{recJ}$ , $\Delta\text{sbcB}$ | rpoB | 0.06256935 | Beta | D2  |
| $\Delta\text{mutS}$ , $\Delta\text{recJ}$ , $\Delta\text{sbcB}$ | rpoB | 0.06053654 | Beta | D3  |
| $\Delta\text{mutS}$ , $\Delta\text{recJ}$ , $\Delta\text{sbcB}$ | rpoB | 0.06256011 | Beta | D4  |
| $\Delta\text{mutS}$ , $\Delta\text{recJ}$ , $\Delta\text{sbcB}$ | rpoB | 0.05899817 | Beta | D5  |
| $\Delta\text{mutS}$ , $\Delta\text{recJ}$ , $\Delta\text{sbcB}$ | rpoB | 0.06520138 | Beta | D6  |
| $\Delta\text{mutS}$ , $\Delta\text{recJ}$ , $\Delta\text{sbcB}$ | gyrA | 0.28783597 | Beta | G9  |
| $\Delta\text{mutS}$ , $\Delta\text{recJ}$ , $\Delta\text{sbcB}$ | gyrA | 0.28481606 | Beta | G10 |
| $\Delta\text{mutS}$ , $\Delta\text{recJ}$ , $\Delta\text{sbcB}$ | gyrA | 0.2888569  | Beta | G11 |
| $\Delta\text{mutS}$ , $\Delta\text{recJ}$ , $\Delta\text{sbcB}$ | gyrA | 0.26955921 | Beta | G12 |
| $\Delta\text{mutS}$ , $\Delta\text{recJ}$ , $\Delta\text{sbcB}$ | gyrA | 0.29316805 | Beta | H1  |
| $\Delta\text{mutS}$ , $\Delta\text{recJ}$ , $\Delta\text{sbcB}$ | gyrA | 0.29879149 | Beta | H2  |
| $\Delta\text{mutS}$ , $\Delta\text{recJ}$ , $\Delta\text{sbcB}$ | gyrA | 0.29285045 | Beta | H3  |
| $\Delta\text{mutS}$ , $\Delta\text{recJ}$ , $\Delta\text{sbcB}$ | gyrA | 0.29838652 | Beta | H4  |
| $\Delta\text{mutS}$ , $\Delta\text{recJ}$ , $\Delta\text{sbcB}$ | gyrA | 0.29406375 | Beta | H5  |
| $\Delta\text{mutS}$ , $\Delta\text{recJ}$ , $\Delta\text{sbcB}$ | gyrA | 0.29958465 | Beta | H6  |



|                                                                             |             |            |         |    |
|-----------------------------------------------------------------------------|-------------|------------|---------|----|
| $\Delta\text{mutS}$ , $\Delta\text{recJ}$ , $\Delta\text{sbcB}$ , + CspRecT | <i>gyrA</i> | 0.84498444 | CspRecT | G1 |
| $\Delta\text{mutS}$ , $\Delta\text{recJ}$ , $\Delta\text{sbcB}$ , + CspRecT | <i>gyrA</i> | 0.8508817  | CspRecT | G2 |
| $\Delta\text{mutS}$ , $\Delta\text{recJ}$ , $\Delta\text{sbcB}$ , + CspRecT | <i>gyrA</i> | 0.82264361 | CspRecT | G3 |
| $\Delta\text{mutS}$ , $\Delta\text{recJ}$ , $\Delta\text{sbcB}$ , + CspRecT | <i>gyrA</i> | 0.8452907  | CspRecT | G4 |
| $\Delta\text{mutS}$ , $\Delta\text{recJ}$ , $\Delta\text{sbcB}$ , + CspRecT | <i>gyrA</i> | 0.81406457 | CspRecT | G5 |
| $\Delta\text{mutS}$ , $\Delta\text{recJ}$ , $\Delta\text{sbcB}$ , + CspRecT | <i>gyrA</i> | 0.85009398 | CspRecT | G6 |
| $\Delta\text{mutS}$ , $\Delta\text{recJ}$ , $\Delta\text{sbcB}$ , + CspRecT | <i>gyrA</i> | 0.84937543 | CspRecT | G7 |
| $\Delta\text{mutS}$ , $\Delta\text{recJ}$ , $\Delta\text{sbcB}$ , + CspRecT | <i>gyrA</i> | 0.84486369 | CspRecT | G8 |
| $\Delta\text{mutS}$ , $\Delta\text{recJ}$ , $\Delta\text{sbcB}$ , + CspRecT | <i>rpoB</i> | 0.70608883 | CspRecT | H1 |
| $\Delta\text{mutS}$ , $\Delta\text{recJ}$ , $\Delta\text{sbcB}$ , + CspRecT | <i>rpoB</i> | 0.68284453 | CspRecT | H2 |
| $\Delta\text{mutS}$ , $\Delta\text{recJ}$ , $\Delta\text{sbcB}$ , + CspRecT | <i>rpoB</i> | 0.70397889 | CspRecT | H3 |
| $\Delta\text{mutS}$ , $\Delta\text{recJ}$ , $\Delta\text{sbcB}$ , + CspRecT | <i>rpoB</i> | 0.69858698 | CspRecT | H4 |
| $\Delta\text{mutS}$ , $\Delta\text{recJ}$ , $\Delta\text{sbcB}$ , + CspRecT | <i>rpoB</i> | 0.70239808 | CspRecT | H5 |
| $\Delta\text{mutS}$ , $\Delta\text{recJ}$ , $\Delta\text{sbcB}$ , + CspRecT | <i>rpoB</i> | 0.70515084 | CspRecT | H6 |
| $\Delta\text{mutS}$ , $\Delta\text{recJ}$ , $\Delta\text{sbcB}$ , + CspRecT | <i>rpoB</i> | 0.70141649 | CspRecT | H7 |
| $\Delta\text{mutS}$ , $\Delta\text{recJ}$ , $\Delta\text{sbcB}$ , + CspRecT | <i>rpoB</i> | 0.70163794 | CspRecT | H8 |
| $\Delta\text{mutS}$ , $\Delta\text{sbcB}$                                   | <i>rpoB</i> | 0.06134563 | Beta    | C1 |
| $\Delta\text{mutS}$ , $\Delta\text{sbcB}$                                   | <i>rpoB</i> | 0.00136385 | Beta    | C2 |

|                                        |      |            |      |    |
|----------------------------------------|------|------------|------|----|
| $\Delta\text{mutS}, \Delta\text{sbcB}$ | rpoB | 0.00131544 | Beta | C3 |
| $\Delta\text{mutS}, \Delta\text{sbcB}$ | rpoB | 0.00154202 | Beta | C4 |
| $\Delta\text{mutS}, \Delta\text{sbcB}$ | rpoB | 0.00135054 | Beta | C5 |
| $\Delta\text{mutS}, \Delta\text{sbcB}$ | rpoB | 0.00145458 | Beta | C6 |
| $\Delta\text{mutS}, \Delta\text{sbcB}$ | rpoB | 0.00154701 | Beta | C7 |
| $\Delta\text{mutS}, \Delta\text{sbcB}$ | rpoB | 0.00158267 | Beta | C8 |
| $\Delta\text{mutS}, \Delta\text{sbcB}$ | gyrA | 0.0145603  | Beta | G1 |
| $\Delta\text{mutS}, \Delta\text{sbcB}$ | gyrA | 0.01433665 | Beta | G2 |
| $\Delta\text{mutS}, \Delta\text{sbcB}$ | gyrA | 0.01419199 | Beta | G3 |
| $\Delta\text{mutS}, \Delta\text{sbcB}$ | gyrA | 0.01401869 | Beta | G4 |
| $\Delta\text{mutS}, \Delta\text{sbcB}$ | gyrA | 0.01334759 | Beta | G5 |
| $\Delta\text{mutS}, \Delta\text{sbcB}$ | gyrA | 0.01271887 | Beta | G6 |
| $\Delta\text{mutS}, \Delta\text{sbcB}$ | gyrA | 0.01318843 | Beta | G7 |
| $\Delta\text{mutS}, \Delta\text{sbcB}$ | gyrA | 0.01315153 | Beta | G8 |

**Supplemental table S3:** summarized data from Figure 3C, showing the enrichment scores for all alleles

| SampleNum | rif  | Count | nickname | seq_freq | enrichment.post.rif |
|-----------|------|-------|----------|----------|---------------------|
| S65       | 12.5 | 0     | wecA_ko  | 4.53E-07 | 6.57E-05            |
| S66       | 12.5 | 1     | wecA_ko  | 2.58E-07 | 3.41E-05            |
| S67       | 12.5 | 0     | wecA_ko  | 3.38E-07 | 4.01E-05            |
| S68       | 25   | 0     | wecA_ko  | 4.03E-07 | 5.84E-05            |
| S69       | 25   | 0     | wecA_ko  | 4.26E-07 | 5.63E-05            |
| S70       | 25   | 0     | wecA_ko  | 5.30E-07 | 6.29E-05            |
| S71       | 50   | 0     | wecA_ko  | 6.00E-07 | 8.69E-05            |
| S72       | 50   | 0     | wecA_ko  | 6.00E-07 | 7.93E-05            |
| S73       | 50   | 0     | wecA_ko  | 6.99E-07 | 8.30E-05            |
| S74       | 100  | 0     | wecA_ko  | 7.82E-07 | 0.00011328          |
| S75       | 100  | 0     | wecA_ko  | 4.63E-07 | 6.12E-05            |
| S76       | 100  | 0     | wecA_ko  | 7.10E-07 | 8.43E-05            |
| S65       | 12.5 | 0     | typA_ko  | 4.53E-07 | 5.02E-05            |
| S66       | 12.5 | 0     | typA_ko  | 2.58E-07 | 2.98E-05            |
| S67       | 12.5 | 0     | typA_ko  | 3.38E-07 | 3.73E-05            |

|     |          |     |         |                |            |
|-----|----------|-----|---------|----------------|------------|
| S68 | 25       | 0   | typA_ko | 4.03E-07       | 4.46E-05   |
| S69 | 25       | 0   | typA_ko | 4.26E-07       | 4.93E-05   |
| S70 | 25       | 0   | typA_ko | 5.30E-07       | 5.85E-05   |
| S71 | 50       | 0   | typA_ko | 6.00E-07       | 6.64E-05   |
| S72 | 50       | 0   | typA_ko | 6.00E-07       | 6.95E-05   |
| S73 | 50       | 0   | typA_ko | 6.99E-07       | 7.71E-05   |
| S74 | 100      | 0   | typA_ko | 7.82E-07       | 8.66E-05   |
| S75 | 100      | 0   | typA_ko | 4.63E-07       | 5.36E-05   |
| S76 | 100      | 0   | typA_ko | 7.10E-07       | 7.84E-05   |
| S65 | 12.<br>5 | 1   | yciW_ko | 4.53E-07       | 3.12E-05   |
| S66 | 12.<br>5 | 0   | yciW_ko | 2.58E-07       | 1.79E-05   |
| S67 | 12.<br>5 | 3   | yciW_ko | 1.01E-06       | 6.99E-05   |
| S68 | 25       | 485 | yciW_ko | 0.0001953<br>6 | 0.01347102 |
| S69 | 25       | 0   | yciW_ko | 4.26E-07       | 2.96E-05   |
| S70 | 25       | 0   | yciW_ko | 5.30E-07       | 3.65E-05   |
| S71 | 50       | 0   | yciW_ko | 6.00E-07       | 4.14E-05   |
| S72 | 50       | 1   | yciW_ko | 6.00E-07       | 4.18E-05   |

|     |          |      |         |                |            |
|-----|----------|------|---------|----------------|------------|
| S73 | 50       | 0    | yciW_ko | 6.99E-07       | 4.82E-05   |
| S74 | 100      | 1    | yciW_ko | 7.82E-07       | 5.39E-05   |
| S75 | 100      | 0    | yciW_ko | 4.63E-07       | 3.22E-05   |
| S76 | 100      | 0    | yciW_ko | 7.10E-07       | 4.90E-05   |
| S65 | 12.<br>5 | 0    | ptsP_ko | 4.53E-07       | 4.76E-05   |
| S66 | 12.<br>5 | 0    | ptsP_ko | 2.58E-07       | 2.57E-05   |
| S67 | 12.<br>5 | 0    | ptsP_ko | 3.38E-07       | 3.54E-05   |
| S68 | 25       | 1    | ptsP_ko | 4.03E-07       | 4.23E-05   |
| S69 | 25       | 1680 | ptsP_ko | 0.0007152<br>6 | 0.07139618 |
| S70 | 25       | 0    | ptsP_ko | 5.30E-07       | 5.55E-05   |
| S71 | 50       | 0    | ptsP_ko | 6.00E-07       | 6.30E-05   |
| S72 | 50       | 0    | ptsP_ko | 6.00E-07       | 5.99E-05   |
| S73 | 50       | 0    | ptsP_ko | 6.99E-07       | 7.32E-05   |
| S74 | 100      | 0    | ptsP_ko | 7.82E-07       | 8.21E-05   |
| S75 | 100      | 0    | ptsP_ko | 4.63E-07       | 4.62E-05   |
| S76 | 100      | 0    | ptsP_ko | 7.10E-07       | 7.43E-05   |
| S65 | 12.<br>5 | 0    | evgA_ko | 4.53E-07       | 6.68E-05   |

|     |          |   |         |          |            |
|-----|----------|---|---------|----------|------------|
| S66 | 12.<br>5 | 0 | evgA_ko | 2.58E-07 | 3.52E-05   |
| S67 | 12.<br>5 | 1 | evgA_ko | 3.38E-07 | 4.31E-05   |
| S68 | 25       | 0 | evgA_ko | 4.03E-07 | 5.94E-05   |
| S69 | 25       | 0 | evgA_ko | 4.26E-07 | 5.82E-05   |
| S70 | 25       | 0 | evgA_ko | 5.30E-07 | 6.76E-05   |
| S71 | 50       | 0 | evgA_ko | 6.00E-07 | 8.85E-05   |
| S72 | 50       | 0 | evgA_ko | 6.00E-07 | 8.20E-05   |
| S73 | 50       | 0 | evgA_ko | 6.99E-07 | 8.92E-05   |
| S74 | 100      | 0 | evgA_ko | 7.82E-07 | 0.00011525 |
| S75 | 100      | 0 | evgA_ko | 4.63E-07 | 6.32E-05   |
| S76 | 100      | 0 | evgA_ko | 7.10E-07 | 9.06E-05   |
| S65 | 12.<br>5 | 1 | ackA_ko | 4.53E-07 | 3.14E-05   |
| S66 | 12.<br>5 | 0 | ackA_ko | 2.58E-07 | 1.73E-05   |
| S67 | 12.<br>5 | 1 | ackA_ko | 3.38E-07 | 2.36E-05   |
| S68 | 25       | 0 | ackA_ko | 4.03E-07 | 2.79E-05   |
| S69 | 25       | 1 | ackA_ko | 4.26E-07 | 2.85E-05   |
| S70 | 25       | 0 | ackA_ko | 5.30E-07 | 3.71E-05   |

|     |          |     |         |                |            |
|-----|----------|-----|---------|----------------|------------|
| S71 | 50       | 0   | ackA_ko | 6.00E-07       | 4.15E-05   |
| S72 | 50       | 0   | ackA_ko | 6.00E-07       | 4.02E-05   |
| S73 | 50       | 0   | ackA_ko | 6.99E-07       | 4.89E-05   |
| S74 | 100      | 0   | ackA_ko | 7.82E-07       | 5.41E-05   |
| S75 | 100      | 0   | ackA_ko | 4.63E-07       | 3.10E-05   |
| S76 | 100      | 864 | ackA_ko | 0.0006134<br>4 | 0.04294498 |
| S65 | 12.<br>5 | 0   | yobF_ko | 4.53E-07       | 6.82E-05   |
| S66 | 12.<br>5 | 0   | yobF_ko | 2.58E-07       | 3.66E-05   |
| S67 | 12.<br>5 | 1   | yobF_ko | 3.38E-07       | 4.56E-05   |
| S68 | 25       | 0   | yobF_ko | 4.03E-07       | 6.07E-05   |
| S69 | 25       | 0   | yobF_ko | 4.26E-07       | 6.05E-05   |
| S70 | 25       | 0   | yobF_ko | 5.30E-07       | 7.15E-05   |
| S71 | 50       | 0   | yobF_ko | 6.00E-07       | 9.03E-05   |
| S72 | 50       | 0   | yobF_ko | 6.00E-07       | 8.52E-05   |
| S73 | 50       | 0   | yobF_ko | 6.99E-07       | 9.44E-05   |
| S74 | 100      | 0   | yobF_ko | 7.82E-07       | 0.00011771 |
| S75 | 100      | 0   | yobF_ko | 4.63E-07       | 6.57E-05   |

|     |          |   |         |          |          |
|-----|----------|---|---------|----------|----------|
| S76 | 100      | 0 | yobF_ko | 7.10E-07 | 9.59E-05 |
| S65 | 12.<br>5 | 1 | dapA_ko | 4.53E-07 | 4.95E-05 |
| S66 | 12.<br>5 | 0 | dapA_ko | 2.58E-07 | 2.69E-05 |
| S67 | 12.<br>5 | 0 | dapA_ko | 3.38E-07 | 3.67E-05 |
| S68 | 25       | 0 | dapA_ko | 4.03E-07 | 4.40E-05 |
| S69 | 25       | 0 | dapA_ko | 4.26E-07 | 4.44E-05 |
| S70 | 25       | 0 | dapA_ko | 5.30E-07 | 5.76E-05 |
| S71 | 50       | 1 | dapA_ko | 6.00E-07 | 6.55E-05 |
| S72 | 50       | 0 | dapA_ko | 6.00E-07 | 6.26E-05 |
| S73 | 50       | 0 | dapA_ko | 6.99E-07 | 7.60E-05 |
| S74 | 100      | 0 | dapA_ko | 7.82E-07 | 8.54E-05 |
| S75 | 100      | 0 | dapA_ko | 4.63E-07 | 4.83E-05 |
| S76 | 100      | 0 | dapA_ko | 7.10E-07 | 7.72E-05 |
| S65 | 12.<br>5 | 0 | dapD_ko | 4.53E-07 | 9.63E-05 |
| S66 | 12.<br>5 | 0 | dapD_ko | 2.58E-07 | 5.07E-05 |
| S67 | 12.<br>5 | 0 | dapD_ko | 3.38E-07 | 7.15E-05 |
| S68 | 25       | 0 | dapD_ko | 4.03E-07 | 8.56E-05 |



|     |          |      |         |                |            |
|-----|----------|------|---------|----------------|------------|
| S69 | 25       | 0    | dapD_ko | 4.26E-07       | 8.38E-05   |
| S70 | 25       | 0    | dapD_ko | 5.30E-07       | 0.0001121  |
| S71 | 50       | 0    | dapD_ko | 6.00E-07       | 0.00012746 |
| S72 | 50       | 0    | dapD_ko | 6.00E-07       | 0.00011814 |
| S73 | 50       | 0    | dapD_ko | 6.99E-07       | 0.00014787 |
| S74 | 100      | 0    | dapD_ko | 7.82E-07       | 0.00016607 |
| S75 | 100      | 0    | dapD_ko | 4.63E-07       | 9.11E-05   |
| S76 | 100      | 0    | dapD_ko | 7.10E-07       | 0.00015023 |
| S65 | 12.<br>5 | 0    | dnaJ_ko | 4.53E-07       | 4.29E-05   |
| S66 | 12.<br>5 | 0    | dnaJ_ko | 2.58E-07       | 2.47E-05   |
| S67 | 12.<br>5 | 0    | dnaJ_ko | 3.38E-07       | 3.16E-05   |
| S68 | 25       | 0    | dnaJ_ko | 4.03E-07       | 3.81E-05   |
| S69 | 25       | 0    | dnaJ_ko | 4.26E-07       | 4.07E-05   |
| S70 | 25       | 0    | dnaJ_ko | 5.30E-07       | 4.96E-05   |
| S71 | 50       | 0    | dnaJ_ko | 6.00E-07       | 5.68E-05   |
| S72 | 50       | 2428 | dnaJ_ko | 0.0014570<br>3 | 0.13943068 |
| S73 | 50       | 0    | dnaJ_ko | 6.99E-07       | 6.54E-05   |

|     |     |      |         |           |            |
|-----|-----|------|---------|-----------|------------|
| S74 | 100 | 0    | dnaJ_ko | 7.82E-07  | 7.40E-05   |
| S75 | 100 | 0    | dnaJ_ko | 4.63E-07  | 4.43E-05   |
| S76 | 100 | 0    | dnaJ_ko | 7.10E-07  | 6.64E-05   |
| S65 | 12. | 1    | endA_ko | 4.53E-07  | 3.76E-05   |
|     | 5   |      |         |           |            |
| S66 | 12. | 2652 | endA_ko | 0.0006831 | 0.05636256 |
|     | 5   |      |         | 4         |            |
| S67 | 12. | 0    | endA_ko | 3.38E-07  | 2.74E-05   |
|     | 5   |      |         |           |            |
| S68 | 25  | 0    | endA_ko | 4.03E-07  | 3.34E-05   |
| S69 | 25  | 1008 | endA_ko | 0.0004291 | 0.03540789 |
|     |     |      |         | 6         |            |
| S70 | 25  | 0    | endA_ko | 5.30E-07  | 4.30E-05   |
| S71 | 50  | 0    | endA_ko | 6.00E-07  | 4.97E-05   |
| S72 | 50  | 259  | endA_ko | 0.0001554 | 0.01282343 |
|     |     |      |         | 2         |            |
| S73 | 50  | 1    | endA_ko | 6.99E-07  | 5.68E-05   |
| S74 | 100 | 0    | endA_ko | 7.82E-07  | 6.48E-05   |
| S75 | 100 | 0    | endA_ko | 4.63E-07  | 3.82E-05   |
| S76 | 100 | 0    | endA_ko | 7.10E-07  | 5.77E-05   |
| S65 | 12. | 0    | recJ_ko | 4.53E-07  | 2.54E-05   |
|     | 5   |      |         |           |            |
| S66 | 12. | 1639 | recJ_ko | 0.0004221 | 0.023002   |
|     | 5   |      |         | 9         |            |

|     |     |      |         |           |            |
|-----|-----|------|---------|-----------|------------|
| S67 | 12. | 0    | recJ_ko | 3.38E-07  | 1.84E-05   |
|     | 5   |      |         |           |            |
| S68 | 25  | 0    | recJ_ko | 4.03E-07  | 2.26E-05   |
| S69 | 25  | 0    | recJ_ko | 4.26E-07  | 2.32E-05   |
| S70 | 25  | 0    | recJ_ko | 5.30E-07  | 2.88E-05   |
| S71 | 50  | 0    | recJ_ko | 6.00E-07  | 3.36E-05   |
| S72 | 50  | 0    | recJ_ko | 6.00E-07  | 3.27E-05   |
| S73 | 50  | 0    | recJ_ko | 6.99E-07  | 3.80E-05   |
| S74 | 100 | 0    | recJ_ko | 7.82E-07  | 4.38E-05   |
| S75 | 100 | 3918 | recJ_ko | 0.0018126 | 0.09875871 |
|     |     |      |         | 9         |            |
| S76 | 100 | 2    | recJ_ko | 1.42E-06  | 7.73E-05   |
| S65 | 12. | 0    | sbcB_ko | 4.53E-07  | 2.94E-05   |
|     | 5   |      |         |           |            |
| S66 | 12. | 0    | sbcB_ko | 2.58E-07  | 1.62E-05   |
|     | 5   |      |         |           |            |
| S67 | 12. | 0    | sbcB_ko | 3.38E-07  | 2.18E-05   |
|     | 5   |      |         |           |            |
| S68 | 25  | 1    | sbcB_ko | 4.03E-07  | 2.61E-05   |
| S69 | 25  | 0    | sbcB_ko | 4.26E-07  | 2.68E-05   |
| S70 | 25  | 0    | sbcB_ko | 5.30E-07  | 3.42E-05   |
| S71 | 50  | 1    | sbcB_ko | 6.00E-07  | 3.89E-05   |

|     |          |   |         |          |          |
|-----|----------|---|---------|----------|----------|
| S72 | 50       | 0 | sbcB_ko | 6.00E-07 | 3.78E-05 |
| S73 | 50       | 0 | sbcB_ko | 6.99E-07 | 4.51E-05 |
| S74 | 100      | 0 | sbcB_ko | 7.82E-07 | 5.07E-05 |
| S75 | 100      | 2 | sbcB_ko | 9.25E-07 | 5.83E-05 |
| S76 | 100      | 0 | sbcB_ko | 7.10E-07 | 4.58E-05 |
| S65 | 12.<br>5 | 0 | dnaA_ko | 4.53E-07 | 4.50E-05 |
| S66 | 12.<br>5 | 0 | dnaA_ko | 2.58E-07 | 2.70E-05 |
| S67 | 12.<br>5 | 0 | dnaA_ko | 3.38E-07 | 3.65E-05 |
| S68 | 25       | 0 | dnaA_ko | 4.03E-07 | 4.00E-05 |
| S69 | 25       | 0 | dnaA_ko | 4.26E-07 | 4.46E-05 |
| S70 | 25       | 0 | dnaA_ko | 5.30E-07 | 5.72E-05 |
| S71 | 50       | 1 | dnaA_ko | 6.00E-07 | 5.95E-05 |
| S72 | 50       | 0 | dnaA_ko | 6.00E-07 | 6.29E-05 |
| S73 | 50       | 0 | dnaA_ko | 6.99E-07 | 7.55E-05 |
| S74 | 100      | 0 | dnaA_ko | 7.82E-07 | 7.76E-05 |
| S75 | 100      | 0 | dnaA_ko | 4.63E-07 | 4.85E-05 |
| S76 | 100      | 0 | dnaA_ko | 7.10E-07 | 7.67E-05 |

|     |          |     |         |                |            |
|-----|----------|-----|---------|----------------|------------|
| S65 | 12.<br>5 | 0   | galE_ko | 4.53E-07       | 7.44E-05   |
| S66 | 12.<br>5 | 0   | galE_ko | 2.58E-07       | 4.08E-05   |
| S67 | 12.<br>5 | 0   | galE_ko | 3.38E-07       | 5.41E-05   |
| S68 | 25       | 0   | galE_ko | 4.03E-07       | 6.62E-05   |
| S69 | 25       | 1   | galE_ko | 4.26E-07       | 6.74E-05   |
| S70 | 25       | 272 | galE_ko | 0.0001441<br>1 | 0.0230831  |
| S71 | 50       | 0   | galE_ko | 6.00E-07       | 9.85E-05   |
| S72 | 50       | 0   | galE_ko | 6.00E-07       | 9.49E-05   |
| S73 | 50       | 0   | galE_ko | 6.99E-07       | 0.00011195 |
| S74 | 100      | 0   | galE_ko | 7.82E-07       | 0.00012835 |
| S75 | 100      | 0   | galE_ko | 4.63E-07       | 7.32E-05   |
| S76 | 100      | 0   | galE_ko | 7.10E-07       | 0.00011373 |
| S65 | 12.<br>5 | 0   | mutS_ko | 4.53E-07       | 6.58E-05   |
| S66 | 12.<br>5 | 1   | mutS_ko | 2.58E-07       | 4.10E-05   |
| S67 | 12.<br>5 | 0   | mutS_ko | 3.38E-07       | 5.61E-05   |
| S68 | 25       | 0   | mutS_ko | 4.03E-07       | 5.86E-05   |
| S69 | 25       | 0   | mutS_ko | 4.26E-07       | 6.78E-05   |

|     |          |   |         |          |            |
|-----|----------|---|---------|----------|------------|
| S70 | 25       | 0 | mutS_ko | 5.30E-07 | 8.80E-05   |
| S71 | 50       | 0 | mutS_ko | 6.00E-07 | 8.72E-05   |
| S72 | 50       | 0 | mutS_ko | 6.00E-07 | 9.55E-05   |
| S73 | 50       | 0 | mutS_ko | 6.99E-07 | 0.00011609 |
| S74 | 100      | 1 | mutS_ko | 7.82E-07 | 0.0001136  |
| S75 | 100      | 0 | mutS_ko | 4.63E-07 | 7.37E-05   |
| S76 | 100      | 0 | mutS_ko | 7.10E-07 | 0.00011794 |
| S65 | 12.<br>5 | 0 | mutL_ko | 4.53E-07 | 3.33E-05   |
| S66 | 12.<br>5 | 0 | mutL_ko | 2.58E-07 | 1.85E-05   |
| S67 | 12.<br>5 | 0 | mutL_ko | 3.38E-07 | 2.50E-05   |
| S68 | 25       | 0 | mutL_ko | 4.03E-07 | 2.96E-05   |
| S69 | 25       | 0 | mutL_ko | 4.26E-07 | 3.06E-05   |
| S70 | 25       | 0 | mutL_ko | 5.30E-07 | 3.93E-05   |
| S71 | 50       | 0 | mutL_ko | 6.00E-07 | 4.41E-05   |
| S72 | 50       | 0 | mutL_ko | 6.00E-07 | 4.31E-05   |
| S73 | 50       | 0 | mutL_ko | 6.99E-07 | 5.18E-05   |
| S74 | 100      | 1 | mutL_ko | 7.82E-07 | 5.75E-05   |

|     |          |    |               |          |            |
|-----|----------|----|---------------|----------|------------|
| S75 | 100      | 1  | mutL_ko       | 4.63E-07 | 3.32E-05   |
| S76 | 100      | 0  | mutL_ko       | 7.10E-07 | 5.26E-05   |
| S65 | 12.<br>5 | 5  | mcrA_ko       | 2.26E-06 | 0.00040154 |
| S66 | 12.<br>5 | 0  | mcrA_ko       | 2.58E-07 | 4.29E-05   |
| S67 | 12.<br>5 | 0  | mcrA_ko       | 3.38E-07 | 5.43E-05   |
| S68 | 25       | 0  | mcrA_ko       | 4.03E-07 | 7.14E-05   |
| S69 | 25       | 0  | mcrA_ko       | 4.26E-07 | 7.08E-05   |
| S70 | 25       | 0  | mcrA_ko       | 5.30E-07 | 8.52E-05   |
| S71 | 50       | 0  | mcrA_ko       | 6.00E-07 | 0.00010634 |
| S72 | 50       | 0  | mcrA_ko       | 6.00E-07 | 9.98E-05   |
| S73 | 50       | 0  | mcrA_ko       | 6.99E-07 | 0.00011244 |
| S74 | 100      | 0  | mcrA_ko       | 7.82E-07 | 0.00013855 |
| S75 | 100      | 0  | mcrA_ko       | 4.63E-07 | 7.70E-05   |
| S76 | 100      | 0  | mcrA_ko       | 7.10E-07 | 0.00011423 |
| S65 | 12.<br>5 | 10 | marR_mut_V84E | 4.53E-06 | 0.00018641 |
| S66 | 12.<br>5 | 0  | marR_mut_V84E | 2.58E-07 | 1.07E-05   |
| S67 | 12.<br>5 | 1  | marR_mut_V84E | 3.38E-07 | 1.49E-05   |

|     |          |   |               |          |          |
|-----|----------|---|---------------|----------|----------|
| S68 | 25       | 0 | marR_mut_V84E | 4.03E-07 | 1.66E-05 |
| S69 | 25       | 0 | marR_mut_V84E | 4.26E-07 | 1.78E-05 |
| S70 | 25       | 1 | marR_mut_V84E | 5.30E-07 | 2.34E-05 |
| S71 | 50       | 0 | marR_mut_V84E | 6.00E-07 | 2.47E-05 |
| S72 | 50       | 0 | marR_mut_V84E | 6.00E-07 | 2.50E-05 |
| S73 | 50       | 0 | marR_mut_V84E | 6.99E-07 | 3.09E-05 |
| S74 | 100      | 0 | marR_mut_V84E | 7.82E-07 | 3.22E-05 |
| S75 | 100      | 1 | marR_mut_V84E | 4.63E-07 | 1.93E-05 |
| S76 | 100      | 0 | marR_mut_V84E | 7.10E-07 | 3.14E-05 |
| S65 | 12.<br>5 | 1 | gyrA_mut_S83L | 4.53E-07 | 2.28E-05 |
| S66 | 12.<br>5 | 0 | gyrA_mut_S83L | 2.58E-07 | 1.29E-05 |
| S67 | 12.<br>5 | 1 | gyrA_mut_S83L | 3.38E-07 | 1.69E-05 |
| S68 | 25       | 0 | gyrA_mut_S83L | 4.03E-07 | 2.03E-05 |
| S69 | 25       | 0 | gyrA_mut_S83L | 4.26E-07 | 2.14E-05 |
| S70 | 25       | 0 | gyrA_mut_S83L | 5.30E-07 | 2.66E-05 |
| S71 | 50       | 0 | gyrA_mut_S83L | 6.00E-07 | 3.02E-05 |
| S72 | 50       | 0 | gyrA_mut_S83L | 6.00E-07 | 3.02E-05 |



|     |          |   |                |          |          |
|-----|----------|---|----------------|----------|----------|
| S73 | 50       | 0 | gyrA_mut_S83L  | 6.99E-07 | 3.50E-05 |
| S74 | 100      | 0 | gyrA_mut_S83L  | 7.82E-07 | 3.94E-05 |
| S75 | 100      | 0 | gyrA_mut_S83L  | 4.63E-07 | 2.33E-05 |
| S76 | 100      | 0 | gyrA_mut_S83L  | 7.10E-07 | 3.56E-05 |
| S65 | 12.<br>5 | 1 | gyrA_mut_D87G  | 4.53E-07 | 1.86E-05 |
| S66 | 12.<br>5 | 1 | gyrA_mut_D87G  | 2.58E-07 | 1.02E-05 |
| S67 | 12.<br>5 | 0 | gyrA_mut_D87G  | 3.38E-07 | 1.39E-05 |
| S68 | 25       | 0 | gyrA_mut_D87G  | 4.03E-07 | 1.66E-05 |
| S69 | 25       | 0 | gyrA_mut_D87G  | 4.26E-07 | 1.68E-05 |
| S70 | 25       | 0 | gyrA_mut_D87G  | 5.30E-07 | 2.18E-05 |
| S71 | 50       | 0 | gyrA_mut_D87G  | 6.00E-07 | 2.46E-05 |
| S72 | 50       | 1 | gyrA_mut_D87G  | 6.00E-07 | 2.37E-05 |
| S73 | 50       | 0 | gyrA_mut_D87G  | 6.99E-07 | 2.87E-05 |
| S74 | 100      | 0 | gyrA_mut_D87G  | 7.82E-07 | 3.21E-05 |
| S75 | 100      | 1 | gyrA_mut_D87G  | 4.63E-07 | 1.83E-05 |
| S76 | 100      | 0 | gyrA_mut_D87G  | 7.10E-07 | 2.92E-05 |
| S65 | 12.<br>5 | 0 | envZ_mut_A396T | 4.53E-07 | 1.90E-05 |

|     |          |   |                |          |          |
|-----|----------|---|----------------|----------|----------|
| S66 | 12.<br>5 | 1 | envZ_mut_A396T | 2.58E-07 | 1.09E-05 |
| S67 | 12.<br>5 | 1 | envZ_mut_A396T | 3.38E-07 | 1.47E-05 |
| S68 | 25       | 0 | envZ_mut_A396T | 4.03E-07 | 1.69E-05 |
| S69 | 25       | 1 | envZ_mut_A396T | 4.26E-07 | 1.79E-05 |
| S70 | 25       | 0 | envZ_mut_A396T | 5.30E-07 | 2.31E-05 |
| S71 | 50       | 0 | envZ_mut_A396T | 6.00E-07 | 2.51E-05 |
| S72 | 50       | 0 | envZ_mut_A396T | 6.00E-07 | 2.53E-05 |
| S73 | 50       | 0 | envZ_mut_A396T | 6.99E-07 | 3.05E-05 |
| S74 | 100      | 0 | envZ_mut_A396T | 7.82E-07 | 3.27E-05 |
| S75 | 100      | 0 | envZ_mut_A396T | 4.63E-07 | 1.95E-05 |
| S76 | 100      | 0 | envZ_mut_A396T | 7.10E-07 | 3.10E-05 |
| S65 | 12.<br>5 | 0 | trkH_mut_T350K | 4.53E-07 | 2.09E-05 |
| S66 | 12.<br>5 | 3 | trkH_mut_T350K | 7.73E-07 | 3.47E-05 |
| S67 | 12.<br>5 | 1 | trkH_mut_T350K | 3.38E-07 | 1.48E-05 |
| S68 | 25       | 1 | trkH_mut_T350K | 4.03E-07 | 1.85E-05 |
| S69 | 25       | 0 | trkH_mut_T350K | 4.26E-07 | 1.91E-05 |
| S70 | 25       | 0 | trkH_mut_T350K | 5.30E-07 | 2.32E-05 |

|     |      |     |                |            |            |
|-----|------|-----|----------------|------------|------------|
| S71 | 50   | 0   | trkH_mut_T350K | 6.00E-07   | 2.76E-05   |
| S72 | 50   | 0   | trkH_mut_T350K | 6.00E-07   | 2.70E-05   |
| S73 | 50   | 0   | trkH_mut_T350K | 6.99E-07   | 3.05E-05   |
| S74 | 100  | 1   | trkH_mut_T350K | 7.82E-07   | 3.60E-05   |
| S75 | 100  | 1   | trkH_mut_T350K | 4.63E-07   | 2.08E-05   |
| S76 | 100  | 1   | trkH_mut_T350K | 7.10E-07   | 3.10E-05   |
| S65 | 12.5 | 4   | soxR_mut_D137E | 1.81E-06   | 7.65E-05   |
| S66 | 12.5 | 0   | soxR_mut_D137E | 2.58E-07   | 1.10E-05   |
| S67 | 12.5 | 0   | soxR_mut_D137E | 3.38E-07   | 1.43E-05   |
| S68 | 25   | 0   | soxR_mut_D137E | 4.03E-07   | 1.70E-05   |
| S69 | 25   | 290 | soxR_mut_D137E | 0.00012347 | 0.00526505 |
| S70 | 25   | 0   | soxR_mut_D137E | 5.30E-07   | 2.24E-05   |
| S71 | 50   | 0   | soxR_mut_D137E | 6.00E-07   | 2.53E-05   |
| S72 | 50   | 0   | soxR_mut_D137E | 6.00E-07   | 2.56E-05   |
| S73 | 50   | 0   | soxR_mut_D137E | 6.99E-07   | 2.95E-05   |
| S74 | 100  | 0   | soxR_mut_D137E | 7.82E-07   | 3.30E-05   |
| S75 | 100  | 1   | soxR_mut_D137E | 4.63E-07   | 1.97E-05   |

|     |      |    |                |          |            |
|-----|------|----|----------------|----------|------------|
| S76 | 100  | 0  | soxR_mut_D137E | 7.10E-07 | 3.00E-05   |
| S65 | 12.5 | 1  | ycbZ_mut_S438R | 4.53E-07 | 2.74E-05   |
| S66 | 12.5 | 0  | ycbZ_mut_S438R | 2.58E-07 | 1.54E-05   |
| S67 | 12.5 | 0  | ycbZ_mut_S438R | 3.38E-07 | 1.95E-05   |
| S68 | 25   | 49 | ycbZ_mut_S438R | 1.97E-05 | 0.00119298 |
| S69 | 25   | 0  | ycbZ_mut_S438R | 4.26E-07 | 2.54E-05   |
| S70 | 25   | 0  | ycbZ_mut_S438R | 5.30E-07 | 3.06E-05   |
| S71 | 50   | 0  | ycbZ_mut_S438R | 6.00E-07 | 3.63E-05   |
| S72 | 50   | 0  | ycbZ_mut_S438R | 6.00E-07 | 3.58E-05   |
| S73 | 50   | 0  | ycbZ_mut_S438R | 6.99E-07 | 4.04E-05   |
| S74 | 100  | 0  | ycbZ_mut_S438R | 7.82E-07 | 4.72E-05   |
| S75 | 100  | 1  | ycbZ_mut_S438R | 4.63E-07 | 2.76E-05   |
| S76 | 100  | 1  | ycbZ_mut_S438R | 7.10E-07 | 4.10E-05   |
| S65 | 12.5 | 3  | folA_mut_P21L  | 1.36E-06 | 6.23E-05   |
| S66 | 12.5 | 0  | folA_mut_P21L  | 2.58E-07 | 1.20E-05   |
| S67 | 12.5 | 1  | folA_mut_P21L  | 3.38E-07 | 1.58E-05   |
| S68 | 25   | 0  | folA_mut_P21L  | 4.03E-07 | 1.85E-05   |

|     |          |   |               |          |          |
|-----|----------|---|---------------|----------|----------|
| S69 | 25       | 0 | folA_mut_P21L | 4.26E-07 | 1.98E-05 |
| S70 | 25       | 0 | folA_mut_P21L | 5.30E-07 | 2.47E-05 |
| S71 | 50       | 1 | folA_mut_P21L | 6.00E-07 | 2.75E-05 |
| S72 | 50       | 0 | folA_mut_P21L | 6.00E-07 | 2.79E-05 |
| S73 | 50       | 0 | folA_mut_P21L | 6.99E-07 | 3.26E-05 |
| S74 | 100      | 0 | folA_mut_P21L | 7.82E-07 | 3.58E-05 |
| S75 | 100      | 0 | folA_mut_P21L | 4.63E-07 | 2.15E-05 |
| S76 | 100      | 0 | folA_mut_P21L | 7.10E-07 | 3.31E-05 |
| S65 | 12.<br>5 | 2 | folA_mut_W30C | 9.06E-07 | 6.56E-05 |
| S66 | 12.<br>5 | 0 | folA_mut_W30C | 2.58E-07 | 1.94E-05 |
| S67 | 12.<br>5 | 1 | folA_mut_W30C | 3.38E-07 | 2.62E-05 |
| S68 | 25       | 1 | folA_mut_W30C | 4.03E-07 | 2.92E-05 |
| S69 | 25       | 2 | folA_mut_W30C | 8.52E-07 | 6.41E-05 |
| S70 | 25       | 0 | folA_mut_W30C | 5.30E-07 | 4.10E-05 |
| S71 | 50       | 0 | folA_mut_W30C | 6.00E-07 | 4.34E-05 |
| S72 | 50       | 0 | folA_mut_W30C | 6.00E-07 | 4.52E-05 |
| S73 | 50       | 0 | folA_mut_W30C | 6.99E-07 | 5.41E-05 |

|     |          |    |               |          |            |
|-----|----------|----|---------------|----------|------------|
| S74 | 100      | 0  | folA_mut_W30C | 7.82E-07 | 5.66E-05   |
| S75 | 100      | 1  | folA_mut_W30C | 4.63E-07 | 3.48E-05   |
| S76 | 100      | 0  | folA_mut_W30C | 7.10E-07 | 5.50E-05   |
| S65 | 12.<br>5 | 66 | folA_mut_W30G | 2.99E-05 | 0.00109125 |
| S66 | 12.<br>5 | 2  | folA_mut_W30G | 5.15E-07 | 1.89E-05   |
| S67 | 12.<br>5 | 0  | folA_mut_W30G | 3.38E-07 | 1.22E-05   |
| S68 | 25       | 0  | folA_mut_W30G | 4.03E-07 | 1.47E-05   |
| S69 | 25       | 0  | folA_mut_W30G | 4.26E-07 | 1.56E-05   |
| S70 | 25       | 0  | folA_mut_W30G | 5.30E-07 | 1.91E-05   |
| S71 | 50       | 0  | folA_mut_W30G | 6.00E-07 | 2.19E-05   |
| S72 | 50       | 0  | folA_mut_W30G | 6.00E-07 | 2.20E-05   |
| S73 | 50       | 0  | folA_mut_W30G | 6.99E-07 | 2.52E-05   |
| S74 | 100      | 0  | folA_mut_W30G | 7.82E-07 | 2.85E-05   |
| S75 | 100      | 0  | folA_mut_W30G | 4.63E-07 | 1.70E-05   |
| S76 | 100      | 0  | folA_mut_W30G | 7.10E-07 | 2.56E-05   |
| S65 | 12.<br>5 | 0  | folA_mut_I94L | 4.53E-07 | 1.69E-05   |
| S66 | 12.<br>5 | 1  | folA_mut_I94L | 2.58E-07 | 9.78E-06   |

|     |          |     |                |                |            |
|-----|----------|-----|----------------|----------------|------------|
| S67 | 12.<br>5 | 3   | folA_mut_I94L  | 1.01E-06       | 3.96E-05   |
| S68 | 25       | 0   | folA_mut_I94L  | 4.03E-07       | 1.51E-05   |
| S69 | 25       | 0   | folA_mut_I94L  | 4.26E-07       | 1.62E-05   |
| S70 | 25       | 0   | folA_mut_I94L  | 5.30E-07       | 2.07E-05   |
| S71 | 50       | 0   | folA_mut_I94L  | 6.00E-07       | 2.24E-05   |
| S72 | 50       | 0   | folA_mut_I94L  | 6.00E-07       | 2.28E-05   |
| S73 | 50       | 0   | folA_mut_I94L  | 6.99E-07       | 2.73E-05   |
| S74 | 100      | 1   | folA_mut_I94L  | 7.82E-07       | 2.92E-05   |
| S75 | 100      | 0   | folA_mut_I94L  | 4.63E-07       | 1.76E-05   |
| S76 | 100      | 0   | folA_mut_I94L  | 7.10E-07       | 2.77E-05   |
| S65 | 12.<br>5 | 2   | folA_mut_F153S | 9.06E-07       | 3.35E-05   |
| S66 | 12.<br>5 | 0   | folA_mut_F153S | 2.58E-07       | 9.72E-06   |
| S67 | 12.<br>5 | 0   | folA_mut_F153S | 3.38E-07       | 1.28E-05   |
| S68 | 25       | 0   | folA_mut_F153S | 4.03E-07       | 1.49E-05   |
| S69 | 25       | 0   | folA_mut_F153S | 4.26E-07       | 1.61E-05   |
| S70 | 25       | 223 | folA_mut_F153S | 0.0001181<br>5 | 0.00448491 |
| S71 | 50       | 2   | folA_mut_F153S | 1.20E-06       | 4.43E-05   |

|     |          |   |                |          |          |
|-----|----------|---|----------------|----------|----------|
| S72 | 50       | 1 | folA_mut_F153S | 6.00E-07 | 2.26E-05 |
| S73 | 50       | 1 | folA_mut_F153S | 6.99E-07 | 2.65E-05 |
| S74 | 100      | 0 | folA_mut_F153S | 7.82E-07 | 2.89E-05 |
| S75 | 100      | 0 | folA_mut_F153S | 4.63E-07 | 1.74E-05 |
| S76 | 100      | 1 | folA_mut_F153S | 7.10E-07 | 2.70E-05 |
| S65 | 12.<br>5 | 1 | folA_mut_D27E  | 4.53E-07 | 2.73E-05 |
| S66 | 12.<br>5 | 1 | folA_mut_D27E  | 2.58E-07 | 1.56E-05 |
| S67 | 12.<br>5 | 1 | folA_mut_D27E  | 3.38E-07 | 2.16E-05 |
| S68 | 25       | 0 | folA_mut_D27E  | 4.03E-07 | 2.43E-05 |
| S69 | 25       | 1 | folA_mut_D27E  | 4.26E-07 | 2.58E-05 |
| S70 | 25       | 0 | folA_mut_D27E  | 5.30E-07 | 3.39E-05 |
| S71 | 50       | 1 | folA_mut_D27E  | 6.00E-07 | 3.61E-05 |
| S72 | 50       | 1 | folA_mut_D27E  | 6.00E-07 | 3.64E-05 |
| S73 | 50       | 0 | folA_mut_D27E  | 6.99E-07 | 4.47E-05 |
| S74 | 100      | 0 | folA_mut_D27E  | 7.82E-07 | 4.71E-05 |
| S75 | 100      | 0 | folA_mut_D27E  | 4.63E-07 | 2.81E-05 |
| S76 | 100      | 0 | folA_mut_D27E  | 7.10E-07 | 4.54E-05 |



|     |          |   |               |          |          |
|-----|----------|---|---------------|----------|----------|
| S65 | 12.<br>5 | 0 | folA_mut_M20V | 4.53E-07 | 3.69E-05 |
| S66 | 12.<br>5 | 2 | folA_mut_M20V | 5.15E-07 | 4.22E-05 |
| S67 | 12.<br>5 | 2 | folA_mut_M20V | 6.76E-07 | 5.57E-05 |
| S68 | 25       | 0 | folA_mut_M20V | 4.03E-07 | 3.28E-05 |
| S69 | 25       | 0 | folA_mut_M20V | 4.26E-07 | 3.49E-05 |
| S70 | 25       | 0 | folA_mut_M20V | 5.30E-07 | 4.37E-05 |
| S71 | 50       | 0 | folA_mut_M20V | 6.00E-07 | 4.89E-05 |
| S72 | 50       | 2 | folA_mut_M20V | 1.20E-06 | 9.83E-05 |
| S73 | 50       | 0 | folA_mut_M20V | 6.99E-07 | 5.77E-05 |
| S74 | 100      | 0 | folA_mut_M20V | 7.82E-07 | 6.37E-05 |
| S75 | 100      | 0 | folA_mut_M20V | 4.63E-07 | 3.79E-05 |
| S76 | 100      | 0 | folA_mut_M20V | 7.10E-07 | 5.86E-05 |
| S65 | 12.<br>5 | 0 | trkH_mut_G84D | 4.53E-07 | 3.38E-05 |
| S66 | 12.<br>5 | 0 | trkH_mut_G84D | 2.58E-07 | 1.91E-05 |
| S67 | 12.<br>5 | 0 | trkH_mut_G84D | 3.38E-07 | 2.70E-05 |
| S68 | 25       | 1 | trkH_mut_G84D | 4.03E-07 | 3.00E-05 |
| S69 | 25       | 0 | trkH_mut_G84D | 4.26E-07 | 3.15E-05 |

|     |          |   |                |          |          |
|-----|----------|---|----------------|----------|----------|
| S70 | 25       | 0 | trkH_mut_G84D  | 5.30E-07 | 4.24E-05 |
| S71 | 50       | 0 | trkH_mut_G84D  | 6.00E-07 | 4.47E-05 |
| S72 | 50       | 0 | trkH_mut_G84D  | 6.00E-07 | 4.44E-05 |
| S73 | 50       | 0 | trkH_mut_G84D  | 6.99E-07 | 5.60E-05 |
| S74 | 100      | 0 | trkH_mut_G84D  | 7.82E-07 | 5.83E-05 |
| S75 | 100      | 0 | trkH_mut_G84D  | 4.63E-07 | 3.42E-05 |
| S76 | 100      | 0 | trkH_mut_G84D  | 7.10E-07 | 5.69E-05 |
| S65 | 12.<br>5 | 1 | trkH_mut_I143S | 4.53E-07 | 2.84E-05 |
| S66 | 12.<br>5 | 1 | trkH_mut_I143S | 2.58E-07 | 1.64E-05 |
| S67 | 12.<br>5 | 0 | trkH_mut_I143S | 3.38E-07 | 2.07E-05 |
| S68 | 25       | 0 | trkH_mut_I143S | 4.03E-07 | 2.52E-05 |
| S69 | 25       | 0 | trkH_mut_I143S | 4.26E-07 | 2.72E-05 |
| S70 | 25       | 3 | trkH_mut_I143S | 1.59E-06 | 9.75E-05 |
| S71 | 50       | 0 | trkH_mut_I143S | 6.00E-07 | 3.75E-05 |
| S72 | 50       | 0 | trkH_mut_I143S | 6.00E-07 | 3.83E-05 |
| S73 | 50       | 0 | trkH_mut_I143S | 6.99E-07 | 4.29E-05 |
| S74 | 100      | 0 | trkH_mut_I143S | 7.82E-07 | 4.89E-05 |

|     |          |      |                |                |            |
|-----|----------|------|----------------|----------------|------------|
| S75 | 100      | 0    | trkH_mut_I143S | 4.63E-07       | 2.95E-05   |
| S76 | 100      | 0    | trkH_mut_I143S | 7.10E-07       | 4.36E-05   |
| S65 | 12.<br>5 | 0    | trkH_mut_L80Q  | 4.53E-07       | 3.00E-05   |
| S66 | 12.<br>5 | 0    | trkH_mut_L80Q  | 2.58E-07       | 1.79E-05   |
| S67 | 12.<br>5 | 1    | trkH_mut_L80Q  | 3.38E-07       | 2.28E-05   |
| S68 | 25       | 0    | trkH_mut_L80Q  | 4.03E-07       | 2.66E-05   |
| S69 | 25       | 0    | trkH_mut_L80Q  | 4.26E-07       | 2.95E-05   |
| S70 | 25       | 0    | trkH_mut_L80Q  | 5.30E-07       | 3.58E-05   |
| S71 | 50       | 2    | trkH_mut_L80Q  | 1.20E-06       | 7.94E-05   |
| S72 | 50       | 0    | trkH_mut_L80Q  | 6.00E-07       | 4.16E-05   |
| S73 | 50       | 0    | trkH_mut_L80Q  | 6.99E-07       | 4.72E-05   |
| S74 | 100      | 0    | trkH_mut_L80Q  | 7.82E-07       | 5.17E-05   |
| S75 | 100      | 1    | trkH_mut_L80Q  | 4.63E-07       | 3.21E-05   |
| S76 | 100      | 0    | trkH_mut_L80Q  | 7.10E-07       | 4.80E-05   |
| S65 | 12.<br>5 | 1    | trkH_mut_L80R  | 4.53E-07       | 3.07E-05   |
| S66 | 12.<br>5 | 0    | trkH_mut_L80R  | 2.58E-07       | 1.72E-05   |
| S67 | 12.<br>5 | 4047 | trkH_mut_L80R  | 0.0013669<br>3 | 0.09322508 |

|     |          |   |               |          |          |
|-----|----------|---|---------------|----------|----------|
| S68 | 25       | 0 | trkH_mut_L80R | 4.03E-07 | 2.73E-05 |
| S69 | 25       | 0 | trkH_mut_L80R | 4.26E-07 | 2.84E-05 |
| S70 | 25       | 0 | trkH_mut_L80R | 5.30E-07 | 3.61E-05 |
| S71 | 50       | 1 | trkH_mut_L80R | 6.00E-07 | 4.06E-05 |
| S72 | 50       | 0 | trkH_mut_L80R | 6.00E-07 | 4.00E-05 |
| S73 | 50       | 0 | trkH_mut_L80R | 6.99E-07 | 4.77E-05 |
| S74 | 100      | 0 | trkH_mut_L80R | 7.82E-07 | 5.29E-05 |
| S75 | 100      | 0 | trkH_mut_L80R | 4.63E-07 | 3.08E-05 |
| S76 | 100      | 0 | trkH_mut_L80R | 7.10E-07 | 4.84E-05 |
| S65 | 12.<br>5 | 0 | marR_ko       | 4.53E-07 | 2.74E-05 |
| S66 | 12.<br>5 | 1 | marR_ko       | 2.58E-07 | 1.59E-05 |
| S67 | 12.<br>5 | 1 | marR_ko       | 3.38E-07 | 2.04E-05 |
| S68 | 25       | 0 | marR_ko       | 4.03E-07 | 2.44E-05 |
| S69 | 25       | 0 | marR_ko       | 4.26E-07 | 2.62E-05 |
| S70 | 25       | 0 | marR_ko       | 5.30E-07 | 3.20E-05 |
| S71 | 50       | 2 | marR_ko       | 1.20E-06 | 7.26E-05 |
| S72 | 50       | 0 | marR_ko       | 6.00E-07 | 3.69E-05 |

|     |          |   |         |          |          |
|-----|----------|---|---------|----------|----------|
| S73 | 50       | 0 | marR_ko | 6.99E-07 | 4.22E-05 |
| S74 | 100      | 0 | marR_ko | 7.82E-07 | 4.73E-05 |
| S75 | 100      | 0 | marR_ko | 4.63E-07 | 2.85E-05 |
| S76 | 100      | 0 | marR_ko | 7.10E-07 | 4.29E-05 |
| S65 | 12.<br>5 | 0 | envZ_ko | 4.53E-07 | 3.05E-05 |
| S66 | 12.<br>5 | 0 | envZ_ko | 2.58E-07 | 1.75E-05 |
| S67 | 12.<br>5 | 0 | envZ_ko | 3.38E-07 | 2.32E-05 |
| S68 | 25       | 1 | envZ_ko | 4.03E-07 | 2.71E-05 |
| S69 | 25       | 1 | envZ_ko | 4.26E-07 | 2.89E-05 |
| S70 | 25       | 0 | envZ_ko | 5.30E-07 | 3.63E-05 |
| S71 | 50       | 0 | envZ_ko | 6.00E-07 | 4.03E-05 |
| S72 | 50       | 0 | envZ_ko | 6.00E-07 | 4.08E-05 |
| S73 | 50       | 0 | envZ_ko | 6.99E-07 | 4.79E-05 |
| S74 | 100      | 0 | envZ_ko | 7.82E-07 | 5.26E-05 |
| S75 | 100      | 0 | envZ_ko | 4.63E-07 | 3.14E-05 |
| S76 | 100      | 2 | envZ_ko | 1.42E-06 | 9.74E-05 |
| S65 | 12.<br>5 | 1 | trkH_ko | 4.53E-07 | 2.57E-05 |

|     |          |   |         |          |          |
|-----|----------|---|---------|----------|----------|
| S66 | 12.<br>5 | 0 | trkH_ko | 2.58E-07 | 1.42E-05 |
| S67 | 12.<br>5 | 3 | trkH_ko | 1.01E-06 | 5.42E-05 |
| S68 | 25       | 0 | trkH_ko | 4.03E-07 | 2.29E-05 |
| S69 | 25       | 0 | trkH_ko | 4.26E-07 | 2.35E-05 |
| S70 | 25       | 0 | trkH_ko | 5.30E-07 | 2.83E-05 |
| S71 | 50       | 1 | trkH_ko | 6.00E-07 | 3.40E-05 |
| S72 | 50       | 0 | trkH_ko | 6.00E-07 | 3.31E-05 |
| S73 | 50       | 0 | trkH_ko | 6.99E-07 | 3.74E-05 |
| S74 | 100      | 1 | trkH_ko | 7.82E-07 | 4.43E-05 |
| S75 | 100      | 0 | trkH_ko | 4.63E-07 | 2.55E-05 |
| S76 | 100      | 0 | trkH_ko | 7.10E-07 | 3.80E-05 |
| S65 | 12.<br>5 | 1 | folA_ko | 4.53E-07 | 2.48E-05 |
| S66 | 12.<br>5 | 2 | folA_ko | 5.15E-07 | 2.86E-05 |
| S67 | 12.<br>5 | 0 | folA_ko | 3.38E-07 | 1.91E-05 |
| S68 | 25       | 0 | folA_ko | 4.03E-07 | 2.21E-05 |
| S69 | 25       | 0 | folA_ko | 4.26E-07 | 2.36E-05 |
| S70 | 25       | 0 | folA_ko | 5.30E-07 | 2.99E-05 |

|     |          |   |         |          |          |
|-----|----------|---|---------|----------|----------|
| S71 | 50       | 0 | folA_ko | 6.00E-07 | 3.29E-05 |
| S72 | 50       | 0 | folA_ko | 6.00E-07 | 3.33E-05 |
| S73 | 50       | 0 | folA_ko | 6.99E-07 | 3.95E-05 |
| S74 | 100      | 0 | folA_ko | 7.82E-07 | 4.28E-05 |
| S75 | 100      | 1 | folA_ko | 4.63E-07 | 2.57E-05 |
| S76 | 100      | 0 | folA_ko | 7.10E-07 | 4.01E-05 |
| S65 | 12.<br>5 | 0 | pgi_ko  | 4.53E-07 | 2.87E-05 |
| S66 | 12.<br>5 | 0 | pgi_ko  | 2.58E-07 | 1.59E-05 |
| S67 | 12.<br>5 | 0 | pgi_ko  | 3.38E-07 | 2.00E-05 |
| S68 | 25       | 0 | pgi_ko  | 4.03E-07 | 2.55E-05 |
| S69 | 25       | 0 | pgi_ko  | 4.26E-07 | 2.63E-05 |
| S70 | 25       | 1 | pgi_ko  | 5.30E-07 | 3.14E-05 |
| S71 | 50       | 0 | pgi_ko  | 6.00E-07 | 3.80E-05 |
| S72 | 50       | 0 | pgi_ko  | 6.00E-07 | 3.71E-05 |
| S73 | 50       | 0 | pgi_ko  | 6.99E-07 | 4.15E-05 |
| S74 | 100      | 0 | pgi_ko  | 7.82E-07 | 4.95E-05 |
| S75 | 100      | 0 | pgi_ko  | 4.63E-07 | 2.86E-05 |

|     |      |   |         |          |          |
|-----|------|---|---------|----------|----------|
| S76 | 100  | 1 | pgi_ko  | 7.10E-07 | 4.21E-05 |
| S65 | 12.5 | 0 | galK_ko | 4.53E-07 | 2.98E-05 |
| S66 | 12.5 | 0 | galK_ko | 2.58E-07 | 1.82E-05 |
| S67 | 12.5 | 0 | galK_ko | 3.38E-07 | 2.30E-05 |
| S68 | 25   | 0 | galK_ko | 4.03E-07 | 2.65E-05 |
| S69 | 25   | 0 | galK_ko | 4.26E-07 | 3.02E-05 |
| S70 | 25   | 0 | galK_ko | 5.30E-07 | 3.60E-05 |
| S71 | 50   | 0 | galK_ko | 6.00E-07 | 3.94E-05 |
| S72 | 50   | 0 | galK_ko | 6.00E-07 | 4.25E-05 |
| S73 | 50   | 0 | galK_ko | 6.99E-07 | 4.75E-05 |
| S74 | 100  | 0 | galK_ko | 7.82E-07 | 5.14E-05 |
| S75 | 100  | 0 | galK_ko | 4.63E-07 | 3.28E-05 |
| S76 | 100  | 0 | galK_ko | 7.10E-07 | 4.83E-05 |
| S65 | 12.5 | 3 | fabA_KO | 1.36E-06 | 7.26E-05 |
| S66 | 12.5 | 0 | fabA_KO | 2.58E-07 | 1.39E-05 |
| S67 | 12.5 | 0 | fabA_KO | 3.38E-07 | 1.78E-05 |
| S68 | 25   | 0 | fabA_KO | 4.03E-07 | 2.15E-05 |



|     |          |   |         |          |           |
|-----|----------|---|---------|----------|-----------|
| S69 | 25       | 1 | fabA_KO | 4.26E-07 | 2.29E-05  |
| S70 | 25       | 0 | fabA_KO | 5.30E-07 | 2.79E-05  |
| S71 | 50       | 0 | fabA_KO | 6.00E-07 | 3.21E-05  |
| S72 | 50       | 0 | fabA_KO | 6.00E-07 | 3.23E-05  |
| S73 | 50       | 0 | fabA_KO | 6.99E-07 | 3.68E-05  |
| S74 | 100      | 0 | fabA_KO | 7.82E-07 | 4.18E-05  |
| S75 | 100      | 0 | fabA_KO | 4.63E-07 | 2.49E-05  |
| S76 | 100      | 0 | fabA_KO | 7.10E-07 | 3.73E-05  |
| S65 | 12.<br>5 | 0 | gyrA_KO | 4.53E-07 | 3.52E-05  |
| S66 | 12.<br>5 | 0 | gyrA_KO | 2.58E-07 | 2.06E-05  |
| S67 | 12.<br>5 | 1 | gyrA_KO | 3.38E-07 | 2.75E-05  |
| S68 | 25       | 0 | gyrA_KO | 4.03E-07 | 3.13E-05  |
| S69 | 25       | 0 | gyrA_KO | 4.26E-07 | 3.40E-05  |
| S70 | 25       | 0 | gyrA_KO | 5.30E-07 | 4.32E-05  |
| S71 | 50       | 0 | gyrA_KO | 6.00E-07 | 4.66E-05  |
| S72 | 50       | 0 | gyrA_KO | 6.00E-07 | 4.80E-05  |
| S73 | 50       | 2 | gyrA_KO | 1.40E-06 | 0.0001139 |

|     |          |    |          |          |            |
|-----|----------|----|----------|----------|------------|
| S74 | 100      | 0  | gyrA_KO  | 7.82E-07 | 6.07E-05   |
| S75 | 100      | 0  | gyrA_KO  | 4.63E-07 | 3.70E-05   |
| S76 | 100      | 0  | gyrA_KO  | 7.10E-07 | 5.79E-05   |
| S65 | 12.<br>5 | 0  | lacZ_KO  | 4.53E-07 | 3.78E-05   |
| S66 | 12.<br>5 | 0  | lacZ_KO  | 2.58E-07 | 2.17E-05   |
| S67 | 12.<br>5 | 0  | lacZ_KO  | 3.38E-07 | 2.84E-05   |
| S68 | 25       | 0  | lacZ_KO  | 4.03E-07 | 3.37E-05   |
| S69 | 25       | 0  | lacZ_KO  | 4.26E-07 | 3.58E-05   |
| S70 | 25       | 0  | lacZ_KO  | 5.30E-07 | 4.46E-05   |
| S71 | 50       | 0  | lacZ_KO  | 6.00E-07 | 5.01E-05   |
| S72 | 50       | 0  | lacZ_KO  | 6.00E-07 | 5.05E-05   |
| S73 | 50       | 0  | lacZ_KO  | 6.99E-07 | 5.88E-05   |
| S74 | 100      | 0  | lacZ_KO  | 7.82E-07 | 6.53E-05   |
| S75 | 100      | 0  | lacZ_KO  | 4.63E-07 | 3.90E-05   |
| S76 | 100      | 0  | lacZ_KO  | 7.10E-07 | 5.98E-05   |
| S65 | 12.<br>5 | 45 | lacZ_KO2 | 2.04E-05 | 0.00185809 |
| S66 | 12.<br>5 | 0  | lacZ_KO2 | 2.58E-07 | 2.37E-05   |

|     |          |      |          |           |            |
|-----|----------|------|----------|-----------|------------|
| S67 | 12.<br>5 | 2    | lacZ_KO2 | 6.76E-07  | 5.81E-05   |
| S68 | 25       | 0    | lacZ_KO2 | 4.03E-07  | 3.67E-05   |
| S69 | 25       | 0    | lacZ_KO2 | 4.26E-07  | 3.92E-05   |
| S70 | 25       | 0    | lacZ_KO2 | 5.30E-07  | 4.56E-05   |
| S71 | 50       | 0    | lacZ_KO2 | 6.00E-07  | 5.47E-05   |
| S72 | 50       | 0    | lacZ_KO2 | 6.00E-07  | 5.52E-05   |
| S73 | 50       | 0    | lacZ_KO2 | 6.99E-07  | 6.01E-05   |
| S74 | 100      | 0    | lacZ_KO2 | 7.82E-07  | 7.12E-05   |
| S75 | 100      | 0    | lacZ_KO2 | 4.63E-07  | 4.26E-05   |
| S76 | 100      | 0    | lacZ_KO2 | 7.10E-07  | 6.11E-05   |
| S65 | 12.<br>5 | 0    | recA_KO  | 4.53E-07  | 3.09E-05   |
| S66 | 12.<br>5 | 0    | recA_KO  | 2.58E-07  | 1.83E-05   |
| S67 | 12.<br>5 | 1    | recA_KO  | 3.38E-07  | 2.37E-05   |
| S68 | 25       | 0    | recA_KO  | 4.03E-07  | 2.75E-05   |
| S69 | 25       | 0    | recA_KO  | 4.26E-07  | 3.03E-05   |
| S70 | 25       | 0    | recA_KO  | 5.30E-07  | 3.71E-05   |
| S71 | 50       | 2196 | recA_KO  | 0.0013172 | 0.08987631 |

|     |          |     |               |          |            |
|-----|----------|-----|---------------|----------|------------|
| S72 | 50       | 0   | recA_KO       | 6.00E-07 | 4.27E-05   |
| S73 | 50       | 0   | recA_KO       | 6.99E-07 | 4.90E-05   |
| S74 | 100      | 1   | recA_KO       | 7.82E-07 | 5.33E-05   |
| S75 | 100      | 0   | recA_KO       | 4.63E-07 | 3.30E-05   |
| S76 | 100      | 0   | recA_KO       | 7.10E-07 | 4.98E-05   |
| S65 | 12.<br>5 | 46  | rpoB_A_1538_C | 2.08E-05 | 0.0013945  |
| S66 | 12.<br>5 | 138 | rpoB_A_1538_C | 3.55E-05 | 0.00237748 |
| S67 | 12.<br>5 | 74  | rpoB_A_1538_C | 2.50E-05 | 0.00166847 |
| S68 | 25       | 81  | rpoB_A_1538_C | 3.26E-05 | 0.00218348 |
| S69 | 25       | 55  | rpoB_A_1538_C | 2.34E-05 | 0.00156611 |
| S70 | 25       | 122 | rpoB_A_1538_C | 6.46E-05 | 0.00431463 |
| S71 | 50       | 77  | rpoB_A_1538_C | 4.62E-05 | 0.00309086 |
| S72 | 50       | 72  | rpoB_A_1538_C | 4.32E-05 | 0.00288973 |
| S73 | 50       | 85  | rpoB_A_1538_C | 5.94E-05 | 0.00396541 |
| S74 | 100      | 53  | rpoB_A_1538_C | 4.14E-05 | 0.00277194 |
| S75 | 100      | 52  | rpoB_A_1538_C | 2.41E-05 | 0.00160903 |
| S76 | 100      | 137 | rpoB_A_1538_C | 9.73E-05 | 0.00649304 |

|     |          |        |               |                |            |
|-----|----------|--------|---------------|----------------|------------|
| S65 | 12.<br>5 | 72350  | rpoB_A_1547_G | 0.0327741<br>9 | 1.74348159 |
| S66 | 12.<br>5 | 257867 | rpoB_A_1547_G | 0.0664246<br>7 | 3.73486669 |
| S67 | 12.<br>5 | 194295 | rpoB_A_1547_G | 0.0656260<br>1 | 3.49098096 |
| S68 | 25       | 28324  | rpoB_A_1547_G | 0.0114091      | 0.60692769 |
| S69 | 25       | 30207  | rpoB_A_1547_G | 0.0128606<br>7 | 0.72311823 |
| S70 | 25       | 33034  | rpoB_A_1547_G | 0.0175014<br>1 | 0.93098892 |
| S71 | 50       | 227    | rpoB_A_1547_G | 0.0001361<br>6 | 0.00724322 |
| S72 | 50       | 495    | rpoB_A_1547_G | 0.0002970<br>5 | 0.01670213 |
| S73 | 50       | 2695   | rpoB_A_1547_G | 0.0018834<br>6 | 0.10019068 |
| S74 | 100      | 21     | rpoB_A_1547_G | 1.64E-05       | 0.00087306 |
| S75 | 100      | 1285   | rpoB_A_1547_G | 0.0005945<br>1 | 0.03342773 |
| S76 | 100      | 4      | rpoB_A_1547_G | 2.84E-06       | 0.00015107 |
| S65 | 12.<br>5 | 0      | rpoB_A_1623_T | 4.53E-07       | 2.82E-05   |
| S66 | 12.<br>5 | 0      | rpoB_A_1623_T | 2.58E-07       | 1.60E-05   |
| S67 | 12.<br>5 | 0      | rpoB_A_1623_T | 3.38E-07       | 2.11E-05   |
| S68 | 25       | 68     | rpoB_A_1623_T | 2.74E-05       | 0.00170487 |
| S69 | 25       | 1      | rpoB_A_1623_T | 4.26E-07       | 2.64E-05   |

|     |      |      |               |            |            |
|-----|------|------|---------------|------------|------------|
| S70 | 25   | 0    | rpoB_A_1623_T | 5.30E-07   | 3.30E-05   |
| S71 | 50   | 0    | rpoB_A_1623_T | 6.00E-07   | 3.73E-05   |
| S72 | 50   | 0    | rpoB_A_1623_T | 6.00E-07   | 3.72E-05   |
| S73 | 50   | 0    | rpoB_A_1623_T | 6.99E-07   | 4.36E-05   |
| S74 | 100  | 0    | rpoB_A_1623_T | 7.82E-07   | 4.86E-05   |
| S75 | 100  | 1    | rpoB_A_1623_T | 4.63E-07   | 2.87E-05   |
| S76 | 100  | 0    | rpoB_A_1623_T | 7.10E-07   | 4.43E-05   |
| S65 | 12.5 | 1    | rpoB_A_1657_G | 4.53E-07   | 3.05E-05   |
| S66 | 12.5 | 1    | rpoB_A_1657_G | 2.58E-07   | 1.81E-05   |
| S67 | 12.5 | 0    | rpoB_A_1657_G | 3.38E-07   | 2.38E-05   |
| S68 | 25   | 0    | rpoB_A_1657_G | 4.03E-07   | 2.72E-05   |
| S69 | 25   | 0    | rpoB_A_1657_G | 4.26E-07   | 2.99E-05   |
| S70 | 25   | 0    | rpoB_A_1657_G | 5.30E-07   | 3.74E-05   |
| S71 | 50   | 0    | rpoB_A_1657_G | 6.00E-07   | 4.04E-05   |
| S72 | 50   | 2208 | rpoB_A_1657_G | 0.00132501 | 0.09319431 |
| S73 | 50   | 0    | rpoB_A_1657_G | 6.99E-07   | 4.93E-05   |
| S74 | 100  | 0    | rpoB_A_1657_G | 7.82E-07   | 5.27E-05   |

|     |          |      |               |                |            |
|-----|----------|------|---------------|----------------|------------|
| S75 | 100      | 0    | rpoB_A_1657_G | 4.63E-07       | 3.25E-05   |
| S76 | 100      | 0    | rpoB_A_1657_G | 7.10E-07       | 5.01E-05   |
| S65 | 12.<br>5 | 0    | rpoB_A_1657_T | 4.53E-07       | 3.10E-05   |
| S66 | 12.<br>5 | 0    | rpoB_A_1657_T | 2.58E-07       | 1.68E-05   |
| S67 | 12.<br>5 | 1    | rpoB_A_1657_T | 3.38E-07       | 2.30E-05   |
| S68 | 25       | 0    | rpoB_A_1657_T | 4.03E-07       | 2.76E-05   |
| S69 | 25       | 0    | rpoB_A_1657_T | 4.26E-07       | 2.78E-05   |
| S70 | 25       | 0    | rpoB_A_1657_T | 5.30E-07       | 3.60E-05   |
| S71 | 50       | 0    | rpoB_A_1657_T | 6.00E-07       | 4.11E-05   |
| S72 | 50       | 1    | rpoB_A_1657_T | 6.00E-07       | 3.92E-05   |
| S73 | 50       | 0    | rpoB_A_1657_T | 6.99E-07       | 4.75E-05   |
| S74 | 100      | 1    | rpoB_A_1657_T | 7.82E-07       | 5.35E-05   |
| S75 | 100      | 0    | rpoB_A_1657_T | 4.63E-07       | 3.02E-05   |
| S76 | 100      | 0    | rpoB_A_1657_T | 7.10E-07       | 4.83E-05   |
| S65 | 12.<br>5 | 800  | rpoB_A_1714_C | 0.0003624      | 0.01765444 |
| S66 | 12.<br>5 | 1222 | rpoB_A_1714_C | 0.0003147<br>8 | 0.01541766 |
| S67 | 12.<br>5 | 1809 | rpoB_A_1714_C | 0.0006110<br>2 | 0.02906726 |

|     |          |      |               |                |            |
|-----|----------|------|---------------|----------------|------------|
| S68 | 25       | 3    | rpoB_A_1714_C | 1.21E-06       | 5.89E-05   |
| S69 | 25       | 0    | rpoB_A_1714_C | 4.26E-07       | 2.09E-05   |
| S70 | 25       | 0    | rpoB_A_1714_C | 5.30E-07       | 2.52E-05   |
| S71 | 50       | 0    | rpoB_A_1714_C | 6.00E-07       | 2.92E-05   |
| S72 | 50       | 0    | rpoB_A_1714_C | 6.00E-07       | 2.94E-05   |
| S73 | 50       | 2    | rpoB_A_1714_C | 1.40E-06       | 6.65E-05   |
| S74 | 100      | 2    | rpoB_A_1714_C | 1.56E-06       | 7.61E-05   |
| S75 | 100      | 0    | rpoB_A_1714_C | 4.63E-07       | 2.27E-05   |
| S76 | 100      | 0    | rpoB_A_1714_C | 7.10E-07       | 3.38E-05   |
| S65 | 12.<br>5 | 220  | rpoB_A_443_T  | 9.97E-05       | 0.00769318 |
| S66 | 12.<br>5 | 1052 | rpoB_A_443_T  | 0.0002709<br>9 | 0.01971743 |
| S67 | 12.<br>5 | 1404 | rpoB_A_443_T  | 0.0004742<br>2 | 0.03413992 |
| S68 | 25       | 0    | rpoB_A_443_T  | 4.03E-07       | 3.11E-05   |
| S69 | 25       | 12   | rpoB_A_443_T  | 5.11E-06       | 0.00037174 |
| S70 | 25       | 2    | rpoB_A_443_T  | 1.06E-06       | 7.63E-05   |
| S71 | 50       | 0    | rpoB_A_443_T  | 6.00E-07       | 4.63E-05   |
| S72 | 50       | 2089 | rpoB_A_443_T  | 0.0012536      | 0.09121379 |



|     |      |        |               |            |            |
|-----|------|--------|---------------|------------|------------|
| S73 | 50   | 0      | rpoB_A_443_T  | 6.99E-07   | 5.03E-05   |
| S74 | 100  | 0      | rpoB_A_443_T  | 7.82E-07   | 6.03E-05   |
| S75 | 100  | 1      | rpoB_A_443_T  | 4.63E-07   | 3.37E-05   |
| S76 | 100  | 3      | rpoB_A_443_T  | 2.13E-06   | 0.00015334 |
| S65 | 12.5 | 39596  | rpoB_C_1535_T | 0.01793679 | 1.19574727 |
| S66 | 12.5 | 126592 | rpoB_C_1535_T | 0.03260918 | 2.19744792 |
| S67 | 12.5 | 69145  | rpoB_C_1535_T | 0.02335475 | 1.56192447 |
| S68 | 25   | 18550  | rpoB_C_1535_T | 0.00747207 | 0.49812178 |
| S69 | 25   | 14853  | rpoB_C_1535_T | 0.00632368 | 0.42613665 |
| S70 | 25   | 21118  | rpoB_C_1535_T | 0.01118831 | 0.74825482 |
| S71 | 50   | 1825   | rpoB_C_1535_T | 0.00109467 | 0.0729756  |
| S72 | 50   | 445    | rpoB_C_1535_T | 0.00026704 | 0.01799533 |
| S73 | 50   | 343    | rpoB_C_1535_T | 0.00023971 | 0.01603157 |
| S74 | 100  | 87     | rpoB_C_1535_T | 6.80E-05   | 0.00453268 |
| S75 | 100  | 0      | rpoB_C_1535_T | 4.63E-07   | 3.12E-05   |
| S76 | 100  | 1      | rpoB_C_1535_T | 7.10E-07   | 4.75E-05   |
| S65 | 12.5 | 483233 | rpoB_C_1576_A | 0.21890212 | 15.6722414 |

|     |          |        |               |                |            |
|-----|----------|--------|---------------|----------------|------------|
| S66 | 12.<br>5 | 784842 | rpoB_C_1576_A | 0.2021696      | 14.6145837 |
| S67 | 12.<br>5 | 638289 | rpoB_C_1576_A | 0.2155915<br>6 | 15.4743802 |
| S68 | 25       | 578819 | rpoB_C_1576_A | 0.2331523      | 16.6924792 |
| S69 | 25       | 520496 | rpoB_C_1576_A | 0.2216018<br>6 | 16.0193168 |
| S70 | 25       | 357000 | rpoB_C_1576_A | 0.1891385<br>7 | 13.5756806 |
| S71 | 50       | 238142 | rpoB_C_1576_A | 0.1428420<br>6 | 10.2267409 |
| S72 | 50       | 274695 | rpoB_C_1576_A | 0.1648434<br>7 | 11.9163254 |
| S73 | 50       | 258562 | rpoB_C_1576_A | 0.1807015<br>1 | 12.9700991 |
| S74 | 100      | 110423 | rpoB_C_1576_A | 0.0862979      | 6.17847632 |
| S75 | 100      | 135162 | rpoB_C_1576_A | 0.0625334<br>8 | 4.52046621 |
| S76 | 100      | 130502 | rpoB_C_1576_A | 0.0926557<br>4 | 6.65049309 |
| S65 | 12.<br>5 | 240194 | rpoB_C_1576_G | 0.1088066<br>8 | 8.08910455 |
| S66 | 12.<br>5 | 505311 | rpoB_C_1576_G | 0.1301644<br>4 | 9.17993732 |
| S67 | 12.<br>5 | 326547 | rpoB_C_1576_G | 0.1102960<br>8 | 7.79220043 |
| S68 | 25       | 289143 | rpoB_C_1576_G | 0.1164688      | 8.65873631 |
| S69 | 25       | 233316 | rpoB_C_1576_G | 0.0993345<br>9 | 7.00564077 |
| S70 | 25       | 227468 | rpoB_C_1576_G | 0.1205125<br>3 | 8.513972   |

|     |     |        |               |           |            |
|-----|-----|--------|---------------|-----------|------------|
| S71 | 50  | 261766 | rpoB_C_1576_G | 0.1570121 | 11.6728864 |
|     |     |        |               | 8         |            |
| S72 | 50  | 231843 | rpoB_C_1576_G | 0.1391281 | 9.8121084  |
|     |     |        |               | 4         |            |
| S73 | 50  | 197965 | rpoB_C_1576_G | 0.1383520 | 9.77429682 |
|     |     |        |               | 2         |            |
| S74 | 100 | 201990 | rpoB_C_1576_G | 0.1578594 | 11.7358751 |
|     |     |        |               | 4         |            |
| S75 | 100 | 387174 | rpoB_C_1576_G | 0.1791283 | 12.6331471 |
|     |     |        |               |           |            |
| S76 | 100 | 219810 | rpoB_C_1576_G | 0.1560639 | 11.0256103 |
|     |     |        |               | 6         |            |
| S65 | 12. | 766570 | rpoB_C_1576_T | 0.3472523 | 29.106547  |
|     | 5   |        |               | 6         |            |
| S66 | 12. | 124688 | rpoB_C_1576_T | 0.3211890 | 24.9071387 |
|     | 5   | 7      |               | 4         |            |
| S67 | 12. | 924816 | rpoB_C_1576_T | 0.3123703 | 24.9977827 |
|     | 5   |        |               |           |            |
| S68 | 25  | 840428 | rpoB_C_1576_T | 0.3385302 | 28.3754604 |
|     |     |        |               | 1         |            |
| S69 | 25  | 885610 | rpoB_C_1576_T | 0.3770496 | 29.2389406 |
|     |     |        |               | 2         |            |
| S70 | 25  | 715070 | rpoB_C_1576_T | 0.3788440 | 30.3174175 |
|     |     |        |               | 3         |            |
| S71 | 50  | 684565 | rpoB_C_1576_T | 0.4106149 | 34.4175765 |
|     |     |        |               | 9         |            |
| S72 | 50  | 776184 | rpoB_C_1576_T | 0.4657852 | 36.1200893 |
|     |     |        |               | 1         |            |
| S73 | 50  | 569662 | rpoB_C_1576_T | 0.3981203 | 31.8600239 |
|     |     |        |               | 2         |            |
| S74 | 100 | 656197 | rpoB_C_1576_T | 0.5128317 | 42.9853458 |
|     |     |        |               | 9         |            |
| S75 | 100 | 110225 | rpoB_C_1576_T | 0.5099660 | 39.5461679 |
|     |     | 8      |               | 7         |            |

|     |      |        |                              |            |            |
|-----|------|--------|------------------------------|------------|------------|
| S76 | 100  | 680647 | rpoB_C_1576_T                | 0.48325584 | 38.6730892 |
| S65 | 12.5 | 0      | rpoB_C_1721_A                | 4.53E-07   | 2.90E-05   |
| S66 | 12.5 | 2087   | rpoB_C_1721_A                | 0.0005376  | 0.03514962 |
| S67 | 12.5 | 26     | rpoB_C_1721_A                | 8.78E-06   | 0.00057105 |
| S68 | 25   | 1      | rpoB_C_1721_A                | 4.03E-07   | 2.58E-05   |
| S69 | 25   | 15     | rpoB_C_1721_A                | 6.39E-06   | 0.00041755 |
| S70 | 25   | 0      | rpoB_C_1721_A                | 5.30E-07   | 3.45E-05   |
| S71 | 50   | 0      | rpoB_C_1721_A                | 6.00E-07   | 3.85E-05   |
| S72 | 50   | 2      | rpoB_C_1721_A                | 1.20E-06   | 7.85E-05   |
| S73 | 50   | 1      | rpoB_C_1721_A                | 6.99E-07   | 4.54E-05   |
| S74 | 100  | 3      | rpoB_C_1721_A                | 2.34E-06   | 0.00015032 |
| S75 | 100  | 1      | rpoB_C_1721_A                | 4.63E-07   | 3.02E-05   |
| S76 | 100  | 0      | rpoB_C_1721_A                | 7.10E-07   | 4.62E-05   |
| S65 | 12.5 | 1968   | rpoB_CACTCGGCCAG_1595_DELETE | 0.00089149 | 0.08260284 |
| S66 | 12.5 | 13372  | rpoB_CACTCGGCCAG_1595_DELETE | 0.00344453 | 0.31176625 |
| S67 | 12.5 | 5430   | rpoB_CACTCGGCCAG_1595_DELETE | 0.00183406 | 0.16741736 |
| S68 | 25   | 5066   | rpoB_CACTCGGCCAG_1595_DELETE | 0.00204062 | 0.18907695 |

|     |      |      |                              |            |            |
|-----|------|------|------------------------------|------------|------------|
| S69 | 25   | 6077 | rpoB_CACTCGGCCAG_1595_DELETE | 0.00258729 | 0.23417706 |
| S70 | 25   | 5170 | rpoB_CACTCGGCCAG_1595_DELETE | 0.00273907 | 0.25002803 |
| S71 | 50   | 927  | rpoB_CACTCGGCCAG_1595_DELETE | 0.00055603 | 0.05152006 |
| S72 | 50   | 1585 | rpoB_CACTCGGCCAG_1595_DELETE | 0.00095115 | 0.08608934 |
| S73 | 50   | 1379 | rpoB_CACTCGGCCAG_1595_DELETE | 0.00096374 | 0.08797264 |
| S74 | 100  | 150  | rpoB_CACTCGGCCAG_1595_DELETE | 0.00011723 | 0.01086197 |
| S75 | 100  | 791  | rpoB_CACTCGGCCAG_1595_DELETE | 0.00036596 | 0.0331233  |
| S76 | 100  | 82   | rpoB_CACTCGGCCAG_1595_DELETE | 5.82E-05   | 0.00531441 |
| S65 | 12.5 | 4    | rpoB_CG_1574_TT              | 1.81E-06   | 0.00012073 |
| S66 | 12.5 | 1    | rpoB_CG_1574_TT              | 2.58E-07   | 1.71E-05   |
| S67 | 12.5 | 2    | rpoB_CG_1574_TT              | 6.76E-07   | 4.43E-05   |
| S68 | 25   | 0    | rpoB_CG_1574_TT              | 4.03E-07   | 2.68E-05   |
| S69 | 25   | 0    | rpoB_CG_1574_TT              | 4.26E-07   | 2.83E-05   |
| S70 | 25   | 0    | rpoB_CG_1574_TT              | 5.30E-07   | 3.48E-05   |
| S71 | 50   | 1    | rpoB_CG_1574_TT              | 6.00E-07   | 4.00E-05   |
| S72 | 50   | 1    | rpoB_CG_1574_TT              | 6.00E-07   | 3.99E-05   |
| S73 | 50   | 1    | rpoB_CG_1574_TT              | 6.99E-07   | 4.59E-05   |

|     |          |      |                 |                |            |
|-----|----------|------|-----------------|----------------|------------|
| S74 | 100      | 0    | rpoB_CG_1574_TT | 7.82E-07       | 5.21E-05   |
| S75 | 100      | 0    | rpoB_CG_1574_TT | 4.63E-07       | 3.08E-05   |
| S76 | 100      | 0    | rpoB_CG_1574_TT | 7.10E-07       | 4.66E-05   |
| S65 | 12.<br>5 | 0    | rpoB_G_1545_A   | 4.53E-07       | 2.08E-05   |
| S66 | 12.<br>5 | 4    | rpoB_G_1545_A   | 1.03E-06       | 4.73E-05   |
| S67 | 12.<br>5 | 0    | rpoB_G_1545_A   | 3.38E-07       | 1.56E-05   |
| S68 | 25       | 0    | rpoB_G_1545_A   | 4.03E-07       | 1.85E-05   |
| S69 | 25       | 1    | rpoB_G_1545_A   | 4.26E-07       | 1.96E-05   |
| S70 | 25       | 0    | rpoB_G_1545_A   | 5.30E-07       | 2.44E-05   |
| S71 | 50       | 0    | rpoB_G_1545_A   | 6.00E-07       | 2.75E-05   |
| S72 | 50       | 2631 | rpoB_G_1545_A   | 0.0015788<br>5 | 0.07253659 |
| S73 | 50       | 0    | rpoB_G_1545_A   | 6.99E-07       | 3.22E-05   |
| S74 | 100      | 1    | rpoB_G_1545_A   | 7.82E-07       | 3.58E-05   |
| S75 | 100      | 0    | rpoB_G_1545_A   | 4.63E-07       | 2.13E-05   |
| S76 | 100      | 0    | rpoB_G_1545_A   | 7.10E-07       | 3.28E-05   |
| S65 | 12.<br>5 | 2    | rpoB_G_1545_T   | 9.06E-07       | 4.51E-05   |
| S66 | 12.<br>5 | 5663 | rpoB_G_1545_T   | 0.0014587<br>5 | 0.07367214 |

|     |          |        |               |                |            |
|-----|----------|--------|---------------|----------------|------------|
| S67 | 12.<br>5 | 6      | rpoB_G_1545_T | 2.03E-06       | 0.00010244 |
| S68 | 25       | 0      | rpoB_G_1545_T | 4.03E-07       | 2.00E-05   |
| S69 | 25       | 0      | rpoB_G_1545_T | 4.26E-07       | 2.15E-05   |
| S70 | 25       | 0      | rpoB_G_1545_T | 5.30E-07       | 2.68E-05   |
| S71 | 50       | 0      | rpoB_G_1545_T | 6.00E-07       | 2.98E-05   |
| S72 | 50       | 0      | rpoB_G_1545_T | 6.00E-07       | 3.03E-05   |
| S73 | 50       | 0      | rpoB_G_1545_T | 6.99E-07       | 3.53E-05   |
| S74 | 100      | 1      | rpoB_G_1545_T | 7.82E-07       | 3.89E-05   |
| S75 | 100      | 0      | rpoB_G_1545_T | 4.63E-07       | 2.34E-05   |
| S76 | 100      | 1      | rpoB_G_1545_T | 7.10E-07       | 3.59E-05   |
| S65 | 12.<br>5 | 600970 | rpoB_G_1546_T | 0.2722363<br>9 | 20.5576473 |
| S66 | 12.<br>5 | 932750 | rpoB_G_1546_T | 0.2402696<br>3 | 17.6607245 |
| S67 | 12.<br>5 | 794721 | rpoB_G_1546_T | 0.2684287<br>9 | 19.0230411 |
| S68 | 25       | 721553 | rpoB_G_1546_T | 0.2906465<br>4 | 21.9478706 |
| S69 | 25       | 655159 | rpoB_G_1546_T | 0.2789348      | 20.5027609 |
| S70 | 25       | 528019 | rpoB_G_1546_T | 0.2797444<br>2 | 19.824959  |
| S71 | 50       | 477431 | rpoB_G_1546_T | 0.2863721<br>2 | 21.6250918 |

|     |          |        |               |                |            |
|-----|----------|--------|---------------|----------------|------------|
| S72 | 50       | 371455 | rpoB_G_1546_T | 0.2229088      | 16.3846381 |
| S73 | 50       | 400180 | rpoB_G_1546_T | 0.2796742<br>4 | 19.8199853 |
| S74 | 100      | 310620 | rpoB_G_1546_T | 0.2427560<br>8 | 18.3314724 |
| S75 | 100      | 530780 | rpoB_G_1546_T | 0.2455684<br>5 | 18.0502081 |
| S76 | 100      | 376402 | rpoB_G_1546_T | 0.2672434<br>7 | 18.9390397 |
| S65 | 12.<br>5 | 1424   | rpoB_KO       | 0.0006450<br>6 | 0.0359368  |
| S66 | 12.<br>5 | 0      | rpoB_KO       | 2.58E-07       | 1.46E-05   |
| S67 | 12.<br>5 | 1      | rpoB_KO       | 3.38E-07       | 1.87E-05   |
| S68 | 25       | 3      | rpoB_KO       | 1.21E-06       | 6.73E-05   |
| S69 | 25       | 1      | rpoB_KO       | 4.26E-07       | 2.41E-05   |
| S70 | 25       | 2      | rpoB_KO       | 1.06E-06       | 5.87E-05   |
| S71 | 50       | 0      | rpoB_KO       | 6.00E-07       | 3.34E-05   |
| S72 | 50       | 0      | rpoB_KO       | 6.00E-07       | 3.40E-05   |
| S73 | 50       | 0      | rpoB_KO       | 6.99E-07       | 3.87E-05   |
| S74 | 100      | 0      | rpoB_KO       | 7.82E-07       | 4.35E-05   |
| S75 | 100      | 0      | rpoB_KO       | 4.63E-07       | 2.62E-05   |
| S76 | 100      | 0      | rpoB_KO       | 7.10E-07       | 3.94E-05   |



|     |          |   |         |          |          |
|-----|----------|---|---------|----------|----------|
| S65 | 12.<br>5 | 0 | rpsL_KO | 4.53E-07 | 3.82E-05 |
| S66 | 12.<br>5 | 0 | rpsL_KO | 2.58E-07 | 2.28E-05 |
| S67 | 12.<br>5 | 0 | rpsL_KO | 3.38E-07 | 3.14E-05 |
| S68 | 25       | 0 | rpsL_KO | 4.03E-07 | 3.39E-05 |
| S69 | 25       | 0 | rpsL_KO | 4.26E-07 | 3.76E-05 |
| S70 | 25       | 0 | rpsL_KO | 5.30E-07 | 4.93E-05 |
| S71 | 50       | 0 | rpsL_KO | 6.00E-07 | 5.05E-05 |
| S72 | 50       | 0 | rpsL_KO | 6.00E-07 | 5.30E-05 |
| S73 | 50       | 0 | rpsL_KO | 6.99E-07 | 6.50E-05 |
| S74 | 100      | 0 | rpsL_KO | 7.82E-07 | 6.58E-05 |
| S75 | 100      | 0 | rpsL_KO | 4.63E-07 | 4.09E-05 |
| S76 | 100      | 0 | rpsL_KO | 7.10E-07 | 6.60E-05 |

**Supplemental table S4:** summary of aberrantly low and high genomic coverage obtained in the RLR library, resulting from alignment artifacts.

| window  | mean_window_count | notes                                        |
|---------|-------------------|----------------------------------------------|
| 224500  | 228.046           | ribosomal RNA                                |
| 228500  | 235.416           | ribosomal RNA                                |
| 274000  | 306.606           | mobile element IS5A                          |
| 283500  | 228.31            | adjacent to mobile elements IS1B, IS1C, IS30 |
| 381500  | 250.26            | mobile element IS2A                          |
| 574500  | 284.334           | mobile element IS5B                          |
| 688000  | 306.722           | mobile element IS5D                          |
| 1395000 | 296.984           | mobile element IS5F                          |
| 1466500 | 244.556           | adjacent to mobile elements IS2B, IS30C      |
| 1649500 | 243.912           | adjacent to mobile element IS2E              |
| 2067500 | 233.486           | adjacent to mobile element IS5H              |
| 2100500 | 297.728           | adjacent to mobile element IS5I              |
| 2287500 | 235.154           | adjacent to mobile element IS5K              |
| 2288000 | 275.48            | adjacent to mobile element IS5K              |
| 2725000 | 225.774           | adjacent to ribosomal RNA                    |

|         |         |                                  |
|---------|---------|----------------------------------|
| 2726000 | 233.762 | ribosomal RNA                    |
| 2726500 | 245.828 | ribosomal RNA                    |
| 2995000 | 243.252 | adjacent to mobile element IS2H  |
| 3129000 | 297.266 | adjacent to mobile element IS5LO |
| 3185000 | 233.872 | adjacent to mobile element IS2I  |
| 3364500 | 281.456 | adjacent to mobile element IS5R  |
| 3424000 | 256.484 | ribosomal RNA                    |
| 3426000 | 226.362 | ribosomal RNA                    |
| 3651000 | 286.762 | adjacent to mobile element IS5T  |
| 3943000 | 246.63  | ribosomal RNA                    |
| 4034500 | 230.372 | ribosomal RNA                    |
| 4035000 | 228.734 | ribosomal RNA                    |
| 4165500 | 240.72  | ribosomal RNA                    |
| 4166000 | 230.952 | ribosomal RNA                    |
| 4168000 | 246.918 | ribosomal RNA                    |
| 4169500 | 235.474 | ribosomal RNA                    |
| 4207000 | 231.986 | ribosomal RNA                    |
| 4207500 | 230.008 | ribosomal RNA                    |

4209500 246.766 ribosomal RNA

| window  | mean_window<br>_count | notes                                                                                                      |
|---------|-----------------------|------------------------------------------------------------------------------------------------------------|
| 67500   | 0                     | DE(araD-araB)567, this region absent in BW25113( $\Delta$ lacA) parent strain evolved in Baym et al. 2016  |
| 68000   | 0                     |                                                                                                            |
| 68500   | 0                     |                                                                                                            |
| 69000   | 0                     |                                                                                                            |
| 69500   | 0                     |                                                                                                            |
| 70000   | 0                     |                                                                                                            |
| 361000  | 0                     | lacZ4787(del)(::rrnB-3) mutation and $\Delta$ lacA alterations in BW25113(lacA) parent strain. No lacZ,Y,A |
| 364500  | 0                     |                                                                                                            |
| 365000  | 0                     |                                                                                                            |
| 365500  | 0                     |                                                                                                            |
| 3581000 | 0                     |                                                                                                            |
| 4093500 | 0                     | DE(rhaD-rhaB)568 mutation in BW25113( $\Delta$ lacA) parent strain evolved in Baym et al. 2016             |
| 4094000 | 0                     |                                                                                                            |
| 4094500 | 0                     |                                                                                                            |
| 4095000 | 0                     |                                                                                                            |
| 4095000 | 0                     |                                                                                                            |

4640500 0 yjjY and yjtD loci, end of reference genome sequence. Decreased coverage likely an artifact of BWA-MEM alignment of reads from a circular genome to a linear reference sequence.

4641000 0

4641500 0

4642000 0
